# Supplementary material for: Computer‐Aided Production of Scaffolded DNA Nanostructures from Flat Sheet Meshes
Source: PubMed Central journal article supplement — Angew Chem Int Ed Engl. 2016 Jun 15;55(31):8869–72. doi: 10.1002/anie.201602446 (PMC6680348; doi:10.1002/anie.201602446), 2016-06-15
Supplement: ANIE-55-8869-s001.pdf [file ANIE-55-8869-s001.pdf]

## Supporting Information

### **Computer-Aided Production of Scaffolded DNA Nanostructures from Flat Sheet Meshes**

*Erik Benson, Abdulmelik Mohammed, Alessandro Bosco, Ana I. Teixeira, Pekka Orponen, and Björn Högberg\**

anie\_201602446\_sm\_miscellaneous\_information.pdf

|                         |                                                                                    |
|-------------------------|------------------------------------------------------------------------------------|
| Supplementary methods   |                                                                                    |
| Supplementary figure 1  | Two non-isomorphic embeddings of an abstract planar graph obtained from a 2D mesh. |
| Supplementary figure 2  | An Eulerian circuit which is or is not an A-trail depending on the embedding.      |
| Supplementary figure 3  | A schematic for obtaining an embedding from the PLY face list.                     |
| Supplementary figure 4  | Agarose gel electrophoresis of folded structures.                                  |
| Supplementary figure 5  | Area measurement from AFM.                                                         |
| Supplementary table 1   | Area measurements of flat sheets.                                                  |
| Supplementary figure 6  | Estimation of folding yield from AFM.                                              |
| Supplementary table 2   | Folding yield of flat sheets determined from AFM.                                  |
| Supplementary figure 7  | AFM image of 6-tesselation structure.                                              |
| Supplementary figure 8  | AFM image of 4-tesselation structure.                                              |
| Supplementary figure 9  | AFM image of 3-tesselation structure.                                              |
| Supplementary figure 10 | AFM image of Ring structure.                                                       |
| Supplementary figure 11 | AFM image of Three-hole disc structure.                                            |
| Supplementary figure 12 | AFM image of Hand structure.                                                       |
| Supplementary figure 13 | AFM image of map of Scandinavia structure.                                         |
| Supplementary table 3   | Staple strand sequences for folding the 6-tesselation flat sheet.                  |
| Supplementary table 4   | Staple strand sequences for folding the 4-tesselation flat sheet.                  |
| Supplementary table 5   | Staple strand sequences for folding the 3-tesselation flat sheet.                  |
| Supplementary table 6   | Staple strand sequences for folding the ring flat sheet.                           |
| Supplementary table 7   | Staple strand sequences for folding the three-hole disc flat sheet.                |
| Supplementary table 8   | Staple strand sequences for folding the hand flat sheet.                           |
| Supplementary table 9   | Staple strand sequences for folding the map of Scandinavia flat sheet.             |

## Supplementary methods

### Structure design

All meshes presented here were designed in the Stanford triangle format (PLY), this is the input format for our routing pipeline. Export to this format is available in many computer graphics software like Blender. Autodesk Maya however does not currently support export to PLY but several free software are available for the conversion to PLY, we used meshconv, a simple command line converter or meshlab, a mesh processing application with a graphical user interface and useful features for mesh clean-up and repair.

The PLY format is user readable and meshes can easily be created by hand or by script. The 6-tessellation mesh and the ring mesh were created using python scripts. These scripts first generate the vertex coordinates for the mesh and then generate the description of the faces of the mesh. In the PLY format, only the vertex coordinates and how they are connected in faces is explicitly described.

The 4-tessellation mesh was designed in blender as a simple polygon mesh, Autodesk Maya does not appear to support the export of non-triangulated meshes. The 3-tessellation mesh was designed in Maya as a polygon mesh that was triangulated and stretched to make all edges equally long. The three-hole disc mesh was designed in Maya by first creating a larger triangulated polygon mesh. Then the faces not wanted in the final design were deleted as outlined in figure 1. Maya will however automatically fill internal holes like the eyes of the three-hole disc with triangulated faces. After conversion of the mesh to PLY, these faces were manually removed from the PLY file. The map of Scandinavia was created in a similar way by deleting faces from a larger mesh canvas and moving and scaling edges to create a better outline. For the hand shaped mesh, the palm was first created as a polygon mesh and the fingers were then added as extrusions to the mesh.

The PLY format files were then placed in the same folder as the new version of our routing and relaxation package 'Beam SCAffolded Origami Routing' (BSCOR) available from [www.vhelix.net](http://www.vhelix.net). The software is run from command line in windows by navigating to the folder and typing:

```
BSCOR filename.ply scaling_value
```

Here, *filename.ply* is the name of the mesh file and *scaling\_value* is a user input decimal value that determines the size of the final DNA design. This software first finds a scaffold path through the mesh and then starts the physical relaxation simulation to find the DNA configuration of the mesh with the lowest strain. After finishing, the script outputs a file with the same name as the mesh but in the .rply format containing a description of the DNA structure.

The .rply files were imported to our DNA design plugin for Maya: vHelix, available from [www.vhelix.net](http://www.vhelix.net). In the import, vHelix automatically designs the staple strands by putting staple breakpoints on every edge. We then applied a scaffold sequence and from this, vHelix automatically calculates the sequence of the complimentary staple oligonucleotides. To further reduce strain in the structure we used the feature "auto fill strand gaps" in vHelix. This feature will introduce unpaired nucleotides in large gaps on

the scaffold and staples. After exporting the staple strand sequences, these unpaired nucleotides can be assigned to any type, we used Adenines.

### **Algorithm for routing 2D meshes**

For conciseness, we leave the definition of theoretical concepts from this section and refer the reader to Supplementary Note 1 from Benson et al.<sup>[1]</sup>. The support for ‘topologically’ flat object inputs was achieved by a modification of the ‘bscor’ software package introduced in the aforementioned work. The modification only alters the modules preceding the A-trail finding component in the scaffold routing script.

To recap, the scaffold routing in the original pipeline consists of four steps (c.f. Supplementary Note 1 and Extended Data Figure 3 in Benson et al.<sup>[1]</sup>). First, the 3D mesh, given as an ASCII PLY file, is converted to an abstract graph representation in a DIMACS format. Second, the graph is reconditioned for routing by the addition of edges (to change the parity of odd-degree vertices). Third, the Boyer-Myrvold<sup>[2]</sup> algorithm is applied to generate a planar embedding (local cyclic order of edges around vertices) of the abstract graph. Finally, an A-trail search algorithm is employed to output the actual routing as a sequence of edges or vertices.

A key result which allows the application of a standard planar embedding algorithm for fetching the local rotation of edges is Whitney’s unique embedding theorem<sup>[3]</sup>. The theorem implies that 3-connected planar graphs (equivalently polyhedral graphs) have a unique local order of edges (up-to choice of the first edge and the clockwise/counterclockwise orientation of edge rotation). However, non-polyhedral graphs can have two or more non-isomorphic embeddings. For instance, the graph in Supplementary Figure 1 has two non-equivalent embeddings. Indeed, the local rotation around vertex 2 in embedding 1, i.e.  $(\{1,2\}, \{3, 2\}, \{5,2\}, \{4,2\})$ , is neither cyclically- nor mirror-equivalent to the rotation in embedding 2, i.e.  $(\{1,2\}, \{5,2\}, \{4,2\}, \{3,2\})$ . Since the graph is Eulerian, the rotation can equivalently be stated in terms of adjacent vertices. Then, it becomes evident that  $(1, 3, 5, 4)$  can neither be shifted nor reversed to  $(1, 5, 4, 3)$ . As illustrated in Supplementary Figure 2, an Eulerian circuit, specified as sequence of vertices (or edges) can be an A-trail in one embedding while not being one in another. Thus, fetching the correct embedding is paramount to meet the design criteria.

Hence, the modified pipeline implements a new approach for fetching the appropriate embedding both when the input is a 3D mesh inflatable to a ball and when it is a surface deformable to a flat sheet. To achieve this, the new algorithm exploits the face list information directly from the PLY file instead of the edge list information in the abstract graph. The scheme for the new method is illustrated in Supplementary Figure 3. In this figure, the faces of the object are all described as a counter-clockwise list of their bounding vertices. The last line corresponds to the unbounded outer face, and is not available in PLY files generated from 3D modeling software. It is listed here for simplifying the first explanation of the algorithm.



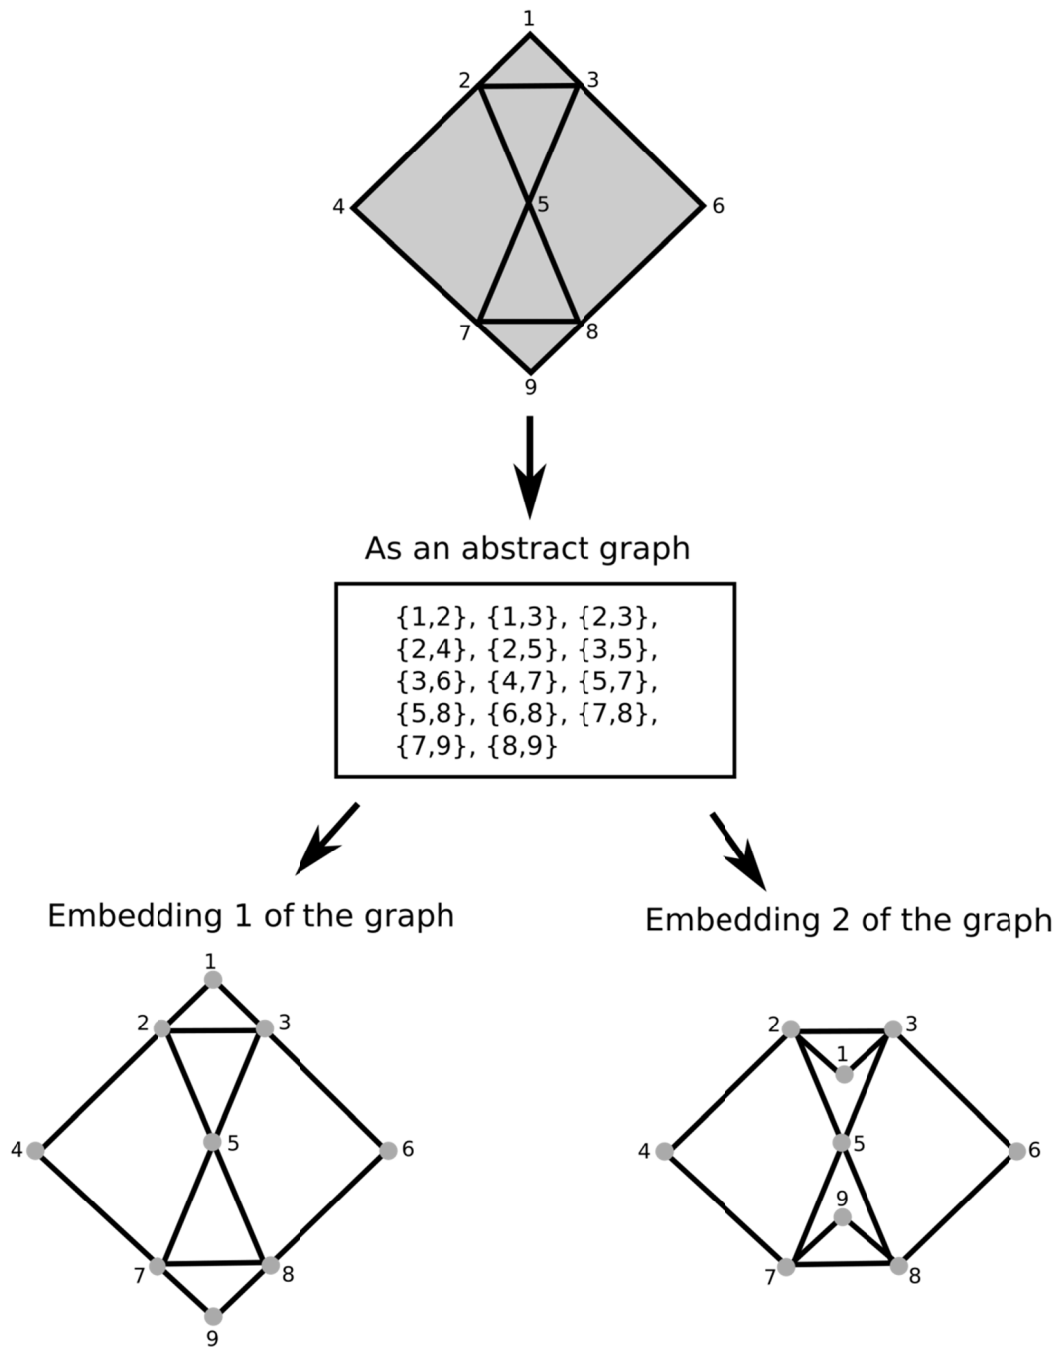

**Supplementary figure 1.** Two non-isomorphic embeddings of an abstract planar graph obtained from a 2D mesh. The local orders of adjacent vertices in the two embeddings are different for some of the vertices. For instance, the clockwise order for vertex 2 is (1 3 5 4) in embedding 1, but (1 5 4 3) in

embedding 2. Here, vertices 1 and 5 are consecutive in the second order but vertex 3 interjects them in the first.

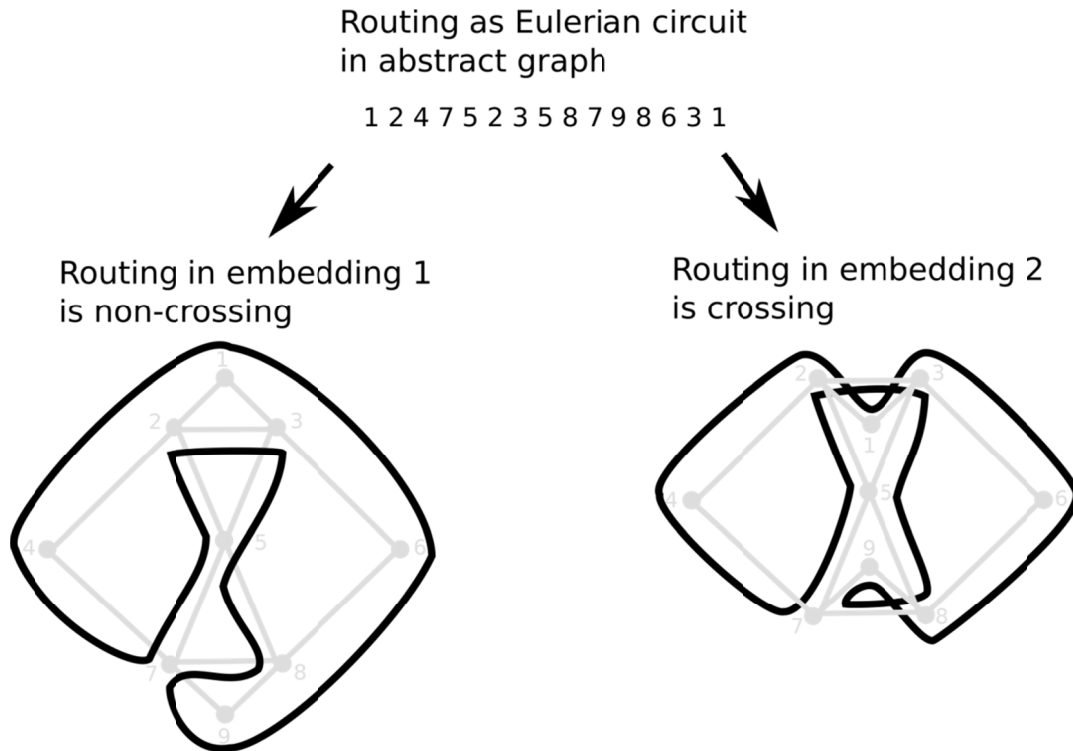

**Supplementary figure 2.** An Eulerian circuit which is or is not an A-trail depending on the embedding. The circuit is an A-trail, and thus non-crossing, in the first embedding. It is however not an A-trail in the second embedding as it crosses itself at vertices 2, 3 and 8. This illustrates the importance of finding the correct embedding corresponding to the mesh.

The algorithm proceeds as follows for each vertex  $v$ . First, it scans the complete face list to find all the faces which vertex  $v$  bounds. For instance, while scanning vertex 2 in Supplementary Figure 3, the algorithm would fetch faces (1 2 3), (2 5 3), (2 4 7 5) and (2 1 3 6 8 9 7 4). To generate the local rotation of vertices (edges) around  $v$ , the algorithm first adds the vertex  $w$  succeeding  $v$  in the first face. In our running example, vertex 3 would first be appended to an initially empty list corresponding to the order around vertex 2. In the succeeding stages, the algorithm appends the vertex succeeding vertex  $v$  in the other face to which the edge  $\{w, v\}$  belongs. In the second stage of the current example, edge  $\{3, 2\}$  appears in the second face (2 5 3), and thus vertex 5 will be appended next. Next,  $\{5, 2\}$  appears in face (2 4 7 5); hence, vertex 4 will be added to the list. Then,  $\{4, 2\}$  is found in the unbounded face (2 1 3 6 8 9 7 4) and thus vertex 1 will be added. The algorithm stops when it finds the first vertex it added. In the current example, the procedure find the previously added vertex 3 again and thus would stop. The resulting order of adjacent vertices for vertex 2 follows the order of addition and in this instance is 3, 5,

4, 1. This is the correct clockwise order around vertex 2 (c.f. line 2 in the embedding generated in Supplementary Figure 3.)

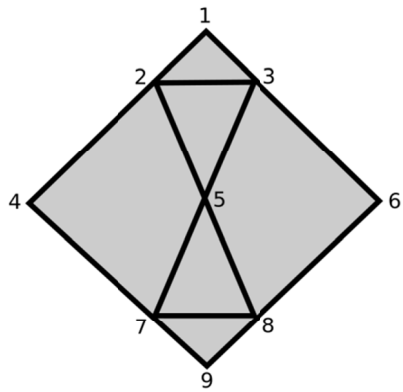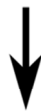

Object's faces described as counter-clockwise list of bounding vertices (available in PLY file)

```

1 2 3
2 5 3
2 4 7 5
3 5 8 6
5 7 8
7 9 8
2 1 3 6 8 9 7 4

```

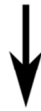

Local clockwise cyclic rotation of vertices (equiv. edges) obtained from face list

```

1 : 2 3
2 : 3 5 4 1
3 : 1 6 5 2
4 : 7 2
5 : 3 8 7 2
6 : 3 8
7 : 5 8 9 4
8 : 6 9 7 5
9 : 8 7

```

**Supplementary figure 3.** A schematic for obtaining an embedding from the PLY face list. If all faces are listed in the PLY, and are all described in the same orientation, the embedding can be found algorithmically.

The above procedure yields the clockwise ordering of edges/vertices for a list of faces all described in counter-clockwise fashion. When all faces are listed, and they are described consistently (in terms of orientation), and the graph does not contain a bridge (an edge whose removal creates multiple components); each edge appears in two faces and in opposing directions. For instance, the edge connecting vertex 2 and 3, appears as (2, 3) in the face (1 2 3) and as (3, 2) in the face (2 5 3). When these conditions are met, the algorithm runs until it stops by finding the originally added vertex. Moreover, it goes through the adjacent faces of a vertex in a consistent orientation (e.g. in clockwise order when the faces are described counter-clockwise). It then follows that it fetches the local rotation of vertex/edges in a consistent orientation (clockwise in the current setting).

But, what about when some faces are not described, as is the case for the unbounded face when obtaining a PLY file from 3D software? The situation is exacerbated when the object contains holes, as in the three-hole disc in Figure 1B, since such holes are not listed in the PLY file generated from Maya. The user can add the unbounded face and the holes in the PLY file, and the new embedding algorithm would function; but, we can aid the user even in this setting. In the above formulation, the algorithm only exploited one direction for fetching the order. More concretely, it only appended to the local order list by going through the adjacent faces of  $v$  in clockwise order. The algorithm would get stuck if it could not find the next face, i.e. when the face is not listed in the PLY file. For instance, it would not find edge {4, 2} in the unbounded face when building the order for vertex 2, if the unbounded face would not be listed. However, the algorithm can also prepend edges/vertices to the list by going through the adjacent faces in the counter-clockwise direction. In the example, the algorithm can go back to the original face, i.e. (1 2 3) and attempt to find the next face in counter-clockwise direction. Since, it does not find any; it can stop, outputting the same order as when the unbounded face was described.

The two-directional navigation of adjacent faces works as long as there is only one face adjacent to a vertex which is not described. However, when there are two faces adjacent to a vertex which are not described, the algorithm gets stuck in between the two holes. For instance, suppose, in addition to the unbounded face, face (2 5 3) was not listed in the PLY file. Then, face (1 2 3) would have two holes as neighbors: holes (2 5 3) and (2 1 3 6 8 9 7 4). As the algorithm traverses the faces in the clockwise direction, it would immediately get stuck when moving from (1 2 3) to (2 5 3) as the latter cannot be found in the PLY. On the other hand when it scans in the counter-clockwise direction, it would also get stuck because (2 1 3 6 8 9 7 4) is also unlisted.

For a mesh with  $n$  vertices,  $f$  faces and maximum vertex degree  $\Delta$ , the new embedding algorithm has a worst-case runtime of  $\mathcal{O}(nf + n\Delta^2)$ . The maximum number of faces (achieved in plane triangulations) is linear in  $n$  ( $1.5n$  more exactly), and the average degree in planar graphs is at most six (since planar triangulations have  $3n-6$  edges). Thus,  $nf$  is at most quadratic in  $n$  and  $n\Delta^2$  is in practical settings linear in  $n$  (all vertices to be implemented as branched DNA junctions would not have more than a certain constant number of arms.) Nevertheless, the runtime can most likely be improved; but the worst-case exponential time A-trail search algorithm clearly dominates the embedding algorithm in the bscor pipeline, and improvements to the embedding algorithm are secondary from the scaffold routing viewpoint.

### **Folding (including washing)**

For the structures, we used two widely used<sup>[4]</sup> M13 variants as scaffold strand. The p7560 scaffold was used for the 6-tesselation, the Hand and the map of Scandinavia. The p8064 scaffold was used for the 4-tesselation, the 3-tesselation, the Ring and the Three-hole disc.

Staple strands were ordered desalted from IDT Europe in DNase free water at a concentration of 100  $\mu$ M. Staple strand sequences are available in supplementary table 2-8. The scaffold strand was prepared from modified m13 phage as described before<sup>[1]</sup>. In the folding reactions the scaffold strand concentration was 5 nM and the staple strand concentration 50 nM each. For the standard folding experiments the buffer was 10 mM  $MgCl_2$ , 5 mM TRIS and 1 mM EDTA (all VWR international). For folding in PBS, 10 x PBS (Sigma Aldrich) was diluted to 1x in the folding reactions. After mixing, samples were put in a thermo cycler on a thermal ramp starting with a denaturing step of 80 °C for 5 minutes followed by a cooling to 60 °C over 20 minutes, then a slower cooling to 24 °C over 14 hours.

After folding, the excess staple strands were removed as to not interfere with imaging. The samples were diluted to 500  $\mu$ l in their folding buffer and placed in a 100 kDa MWCO spin filter (Millipore). The filter was centrifuged at 14 000 x g for 2 minutes. After this, the flow trough was discarded and the sample in the filter again diluted to 500  $\mu$ l. The sample was again centrifuged at 14 000 x g for 2 minutes. After centrifugation, the sample in the filter was diluted to its initial concentration and the filter put upside down in a fresh centrifugation tube. This was centrifuged for 2 minutes at 1 000 x g to recover the sample.

### **AFM**

Imaging was performed in a fluid cell formed by gluing a disc of mica to the center of a microscopy slide using epoxy glue. Around the mica disk, a plastic ring was glued using repro rubber.

For AFM imaging of structures folded in standard folding buffer, the samples were first diluted 10 times in folding buffer and 10  $\mu$ l was added to freshly cleaved mica. After 30 seconds, 4  $\mu$ l of 5 mM  $NiSO_4$  (Merck Millipore) was added to the sample on the mica. This was incubated for 4.5 minutes and then the surface was washed with 1 ml of folding buffer. For imaging, 1.5 ml of folding buffer was added to the mica disc.

Structures folded in PBS were diluted 2-5 times in 1 x PBS. The cleaved mica was first incubated with 10  $\mu$ l of 5 mM  $NiSO_4$  for 5 minutes. Using a pipette, most of the nickel solution was removed before 10  $\mu$ l of the diluted sample was added to the mica surface, this was incubated for 5 minutes. Then, 1.5 ml of imaging buffer (10 mM NaCl (VWR international) and 1-3 mM  $NiSO_4$ ) was added to the sample and imaging started.

Imaging was performed using a JPK instruments nanowizard 3 ultra with a Bruker ScanAsyst fluid + cantilever in AC mode.

### **References**

- [1] E. Benson, A. Mohammed, J. Gardell, S. Masich, E. Czeizler, P. Orponen, B. Högberg, *Nature* **2015**, 523, 441–444.
- [2] J. M. Boyer, W. J. Myrvold, *J. Graph Algorithms Appl.* **2004**, 8, 241–273.
- [3] H. Whitney, *Am. J. Math.* **1932**, 54, 150–168.
- [4] S. M. Douglas, H. Dietz, T. Liedl, B. Högberg, F. Graf, W. M. Shih, *Nature* **2009**, 459, 414–8.

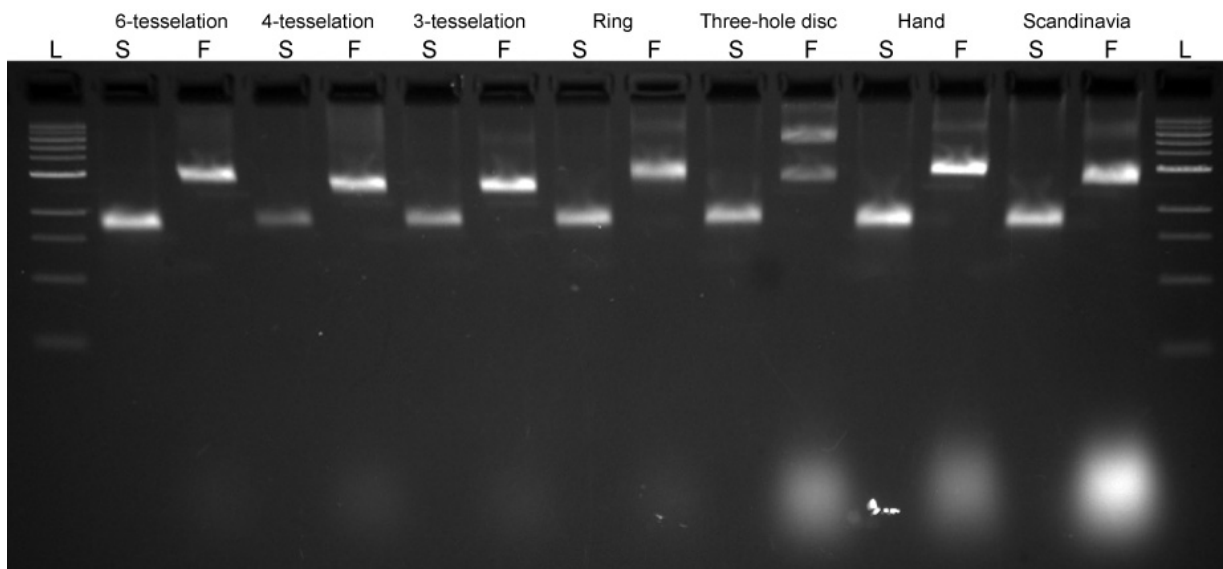

**Supplementary figure 4.** Agarose gel electrophoresis of folded structures. Structures were folded (F) and run in comparison to their scaffold (S). As ladder 1kb ladder from New England Biolabs was used. A 2% agarose gel with 0.5 X TBE and 10 mM  $MgCl_2$  pre stained with EthBr was run for 4h at 70 V on ice and image in a GE healthcare LAS 4010 gel imager.



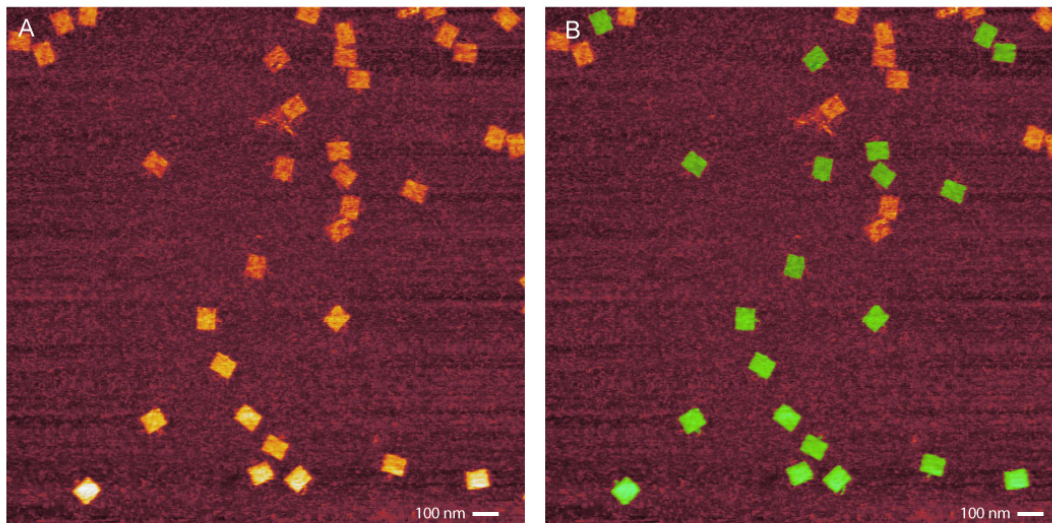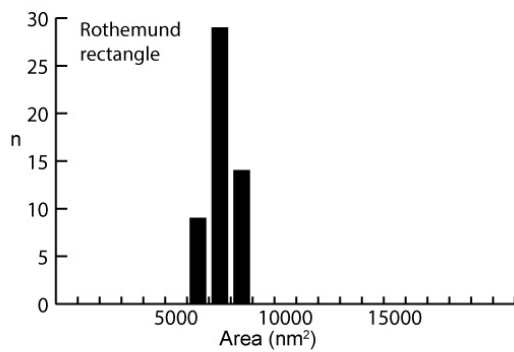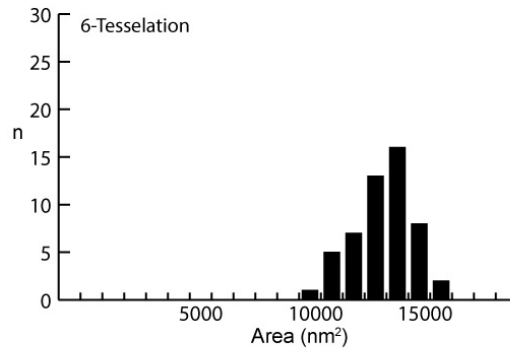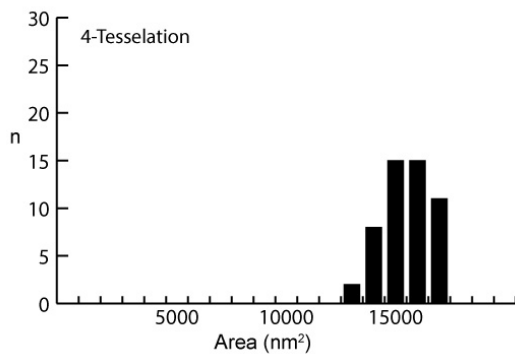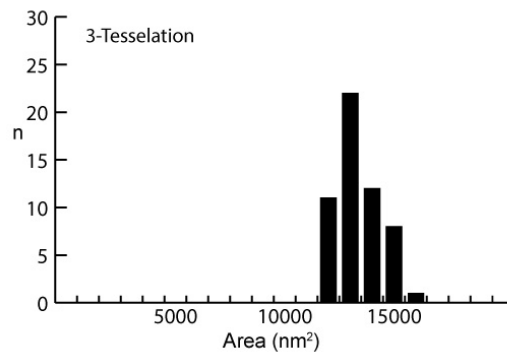

**Supplementary figure 5.** Area measurement from AFM. AFM data was analyzed using the software Gwyddion A) show a height image of the twist corrected Rothmund rectangle that was used as a reference object. The feature “mark grains by segmentation” was used to apply masks to nanostructures as is seen in B). Structures that were touching the edge of the image were automatically removed. Size filtration was used to remove small grains and large masks covering multiple touching/overlapping structures. Some masks that were not corresponding to nanostructures had to be manually removed. The projected area of the masks, corresponding to the surface area of the structures was exported and is shown in the histograms. Addition data is shown in Supplementary table 1.

**Supplementary table 1.** Area measurements of flat sheets.

|                                           | <b>Nr<br/>measured</b> | <b>Average area (nm<sup>2</sup>)</b> | <b>max</b> | <b>min</b> | <b>Base<br/>use</b> | <b>Relative<br/>area</b> |
|-------------------------------------------|------------------------|--------------------------------------|------------|------------|---------------------|--------------------------|
| <b>Twist corrected Rothmund rectangle</b> | 52                     | 6 613                                | 7 748      | 5 684      | 6768                | 1                        |
| <b>6-tesselation</b>                      | 52                     | 13 775                               | 16 610     | 10 400     | 7461                | 1,889537                 |
| <b>4-tesselation</b>                      | 51                     | 15 081                               | 16 960     | 12 710     | 7922                | 1,948306                 |
| <b>3-tesselation</b>                      | 54                     | 12 831                               | 15 400     | 11 101     | 7706                | 1,704088                 |

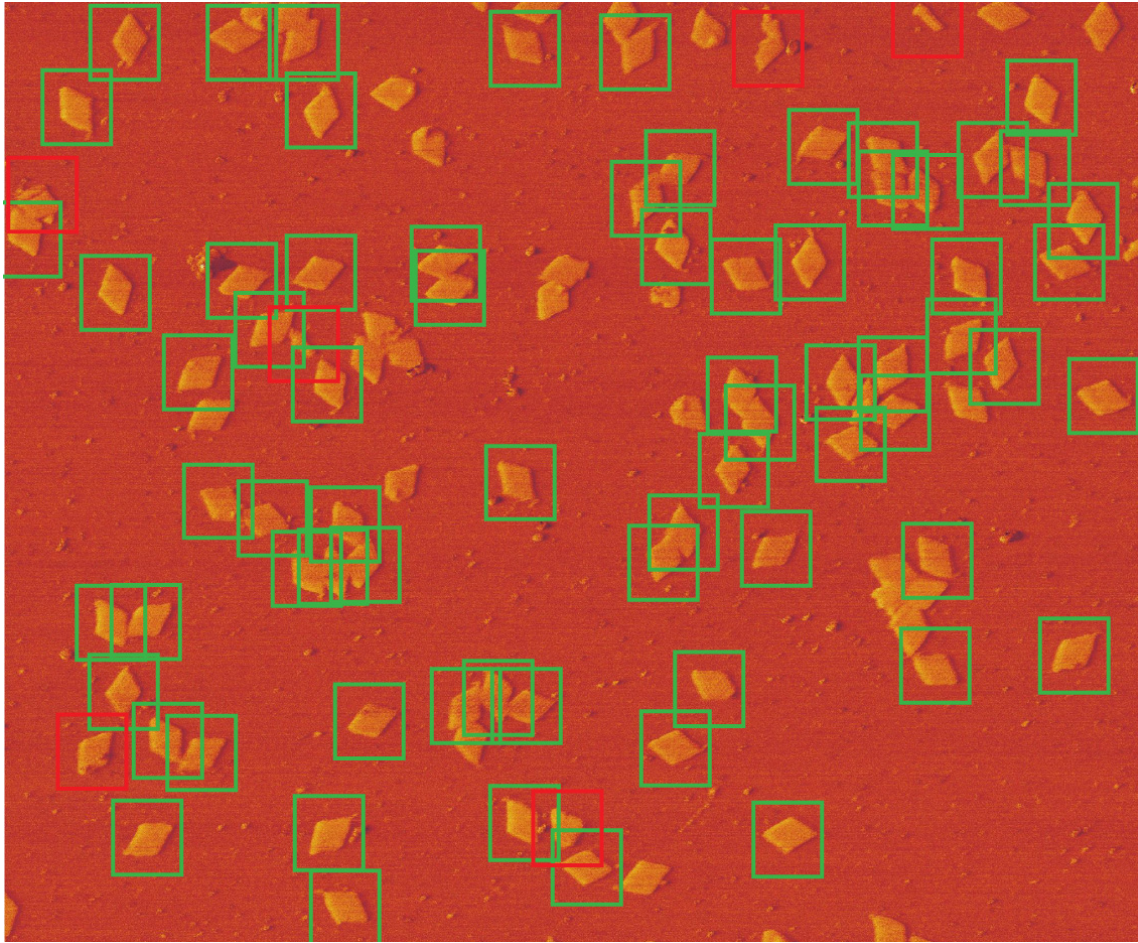

**Supplementary figure 6.** Estimation of folding yield from AFM. Example image of 3-tessellation structure. Structures where all features of the design appear to have folded successfully were counted as well-folded (green box). Structures that are fragmented or have holes were counted as misfolded (red box). Structures that did not land flat or overlapped with other structures or appeared to be damaged by scanning were not counted. Result of folding yield estimation from AFM is given in supplementary table 2.

**Supplementary table 2.** Folding yield of flat sheets determined from AFM.

| <b>Structure</b>   | <b>Nr well folded</b> | <b>Nr miss-folded</b> | <b>Total nr</b> | <b>Yield</b> |
|--------------------|-----------------------|-----------------------|-----------------|--------------|
| 6-Tesselation      | 86                    | 72                    | 158             | 0,54         |
| 4-Tesselation      | 82                    | 39                    | 121             | 0,68         |
| 3-Tesselation      | 165                   | 12                    | 177             | 0,93         |
| Ring               | 95                    | 26                    | 121             | 0,79         |
| Three-hole disc    | 96                    | 110                   | 206             | 0,47         |
| Hand               | 93                    | 81                    | 174             | 0,53         |
| Map of Scandinavia | 68                    | 60                    | 128             | 0,53         |



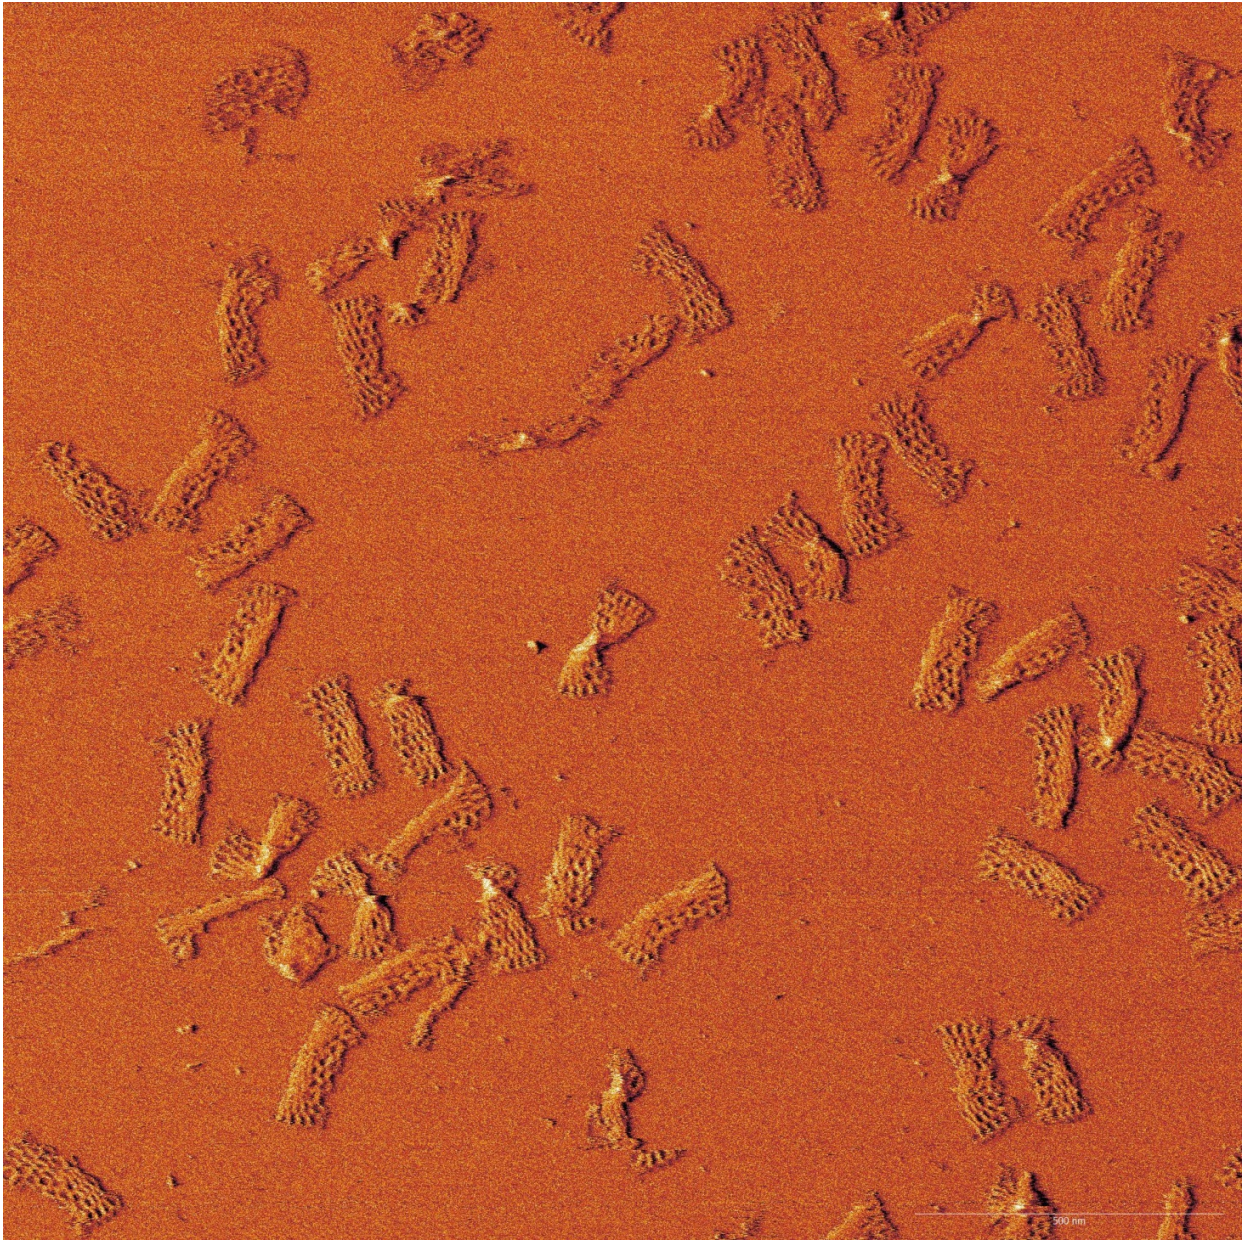

**Supplementary figure 7.** AFM image of 6-tessellation structure. Scale bar 500 nm



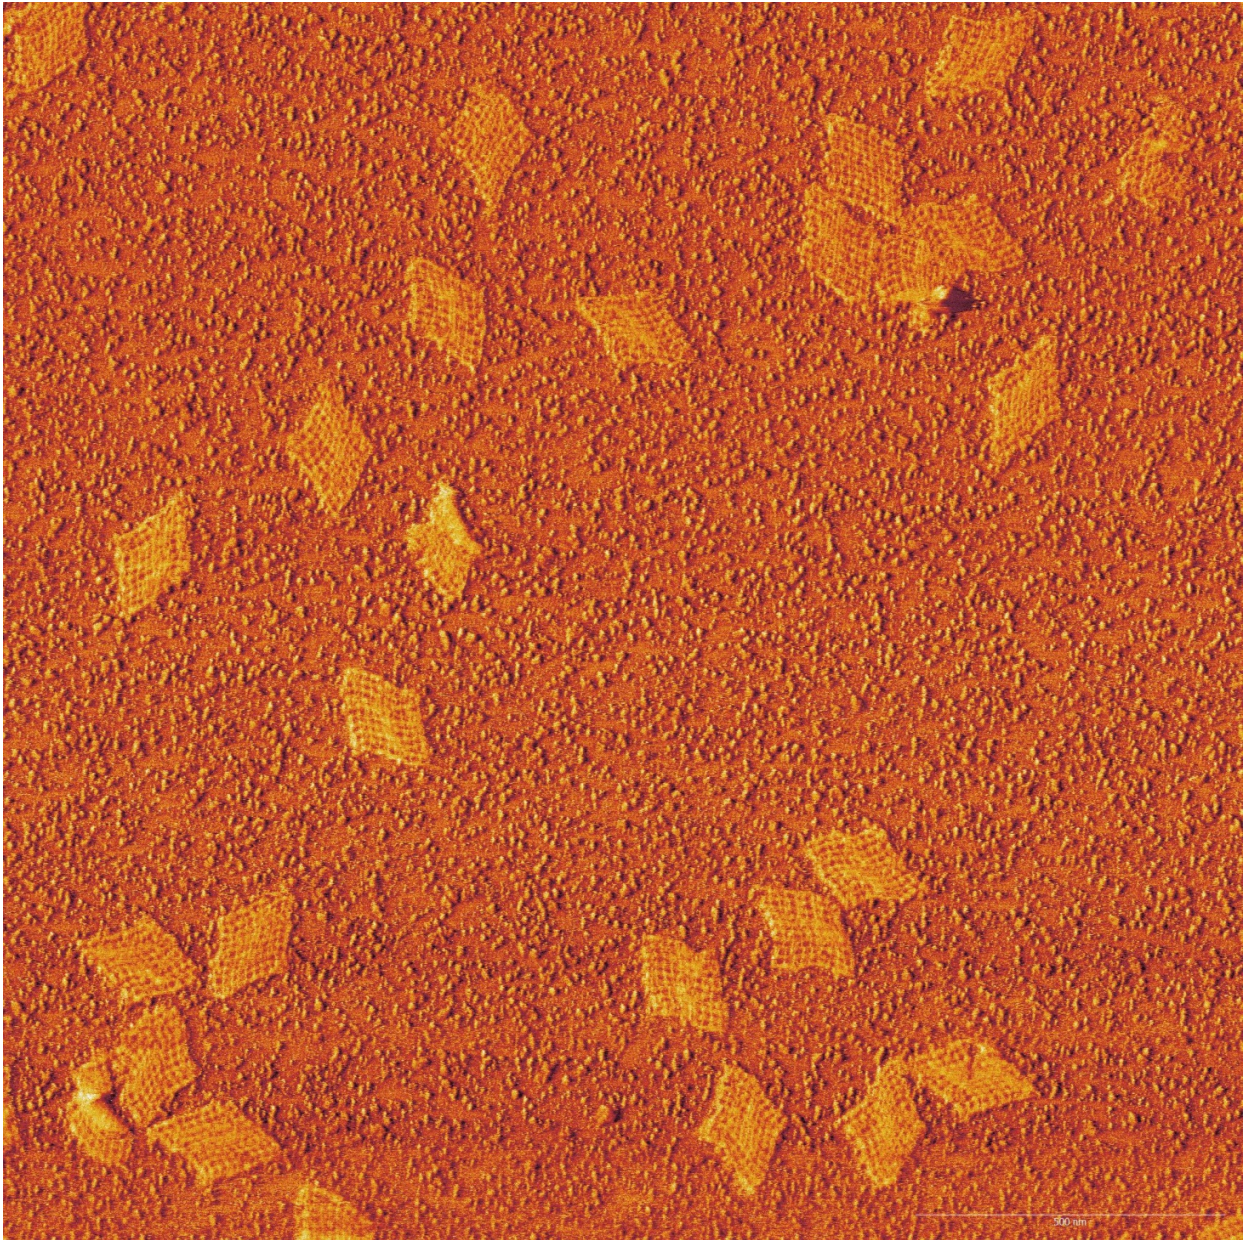

**Supplementary figure 8.** AFM image of 4-tessellation structure . Scale bar 500 nm



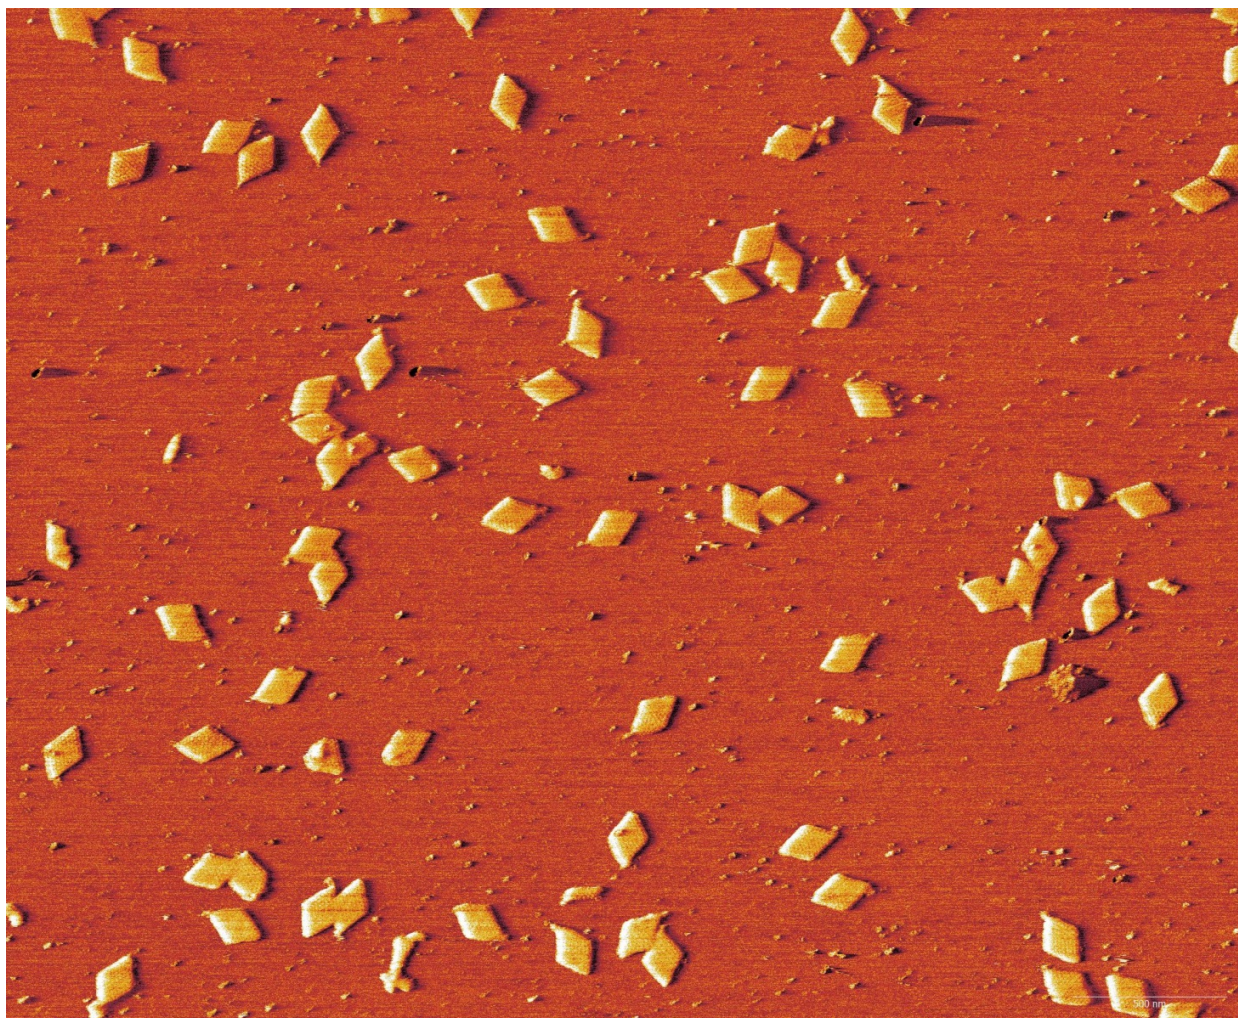

**Supplementary figure 9.** AFM image of 3-tessellation structure. . Scale bar 500 nm



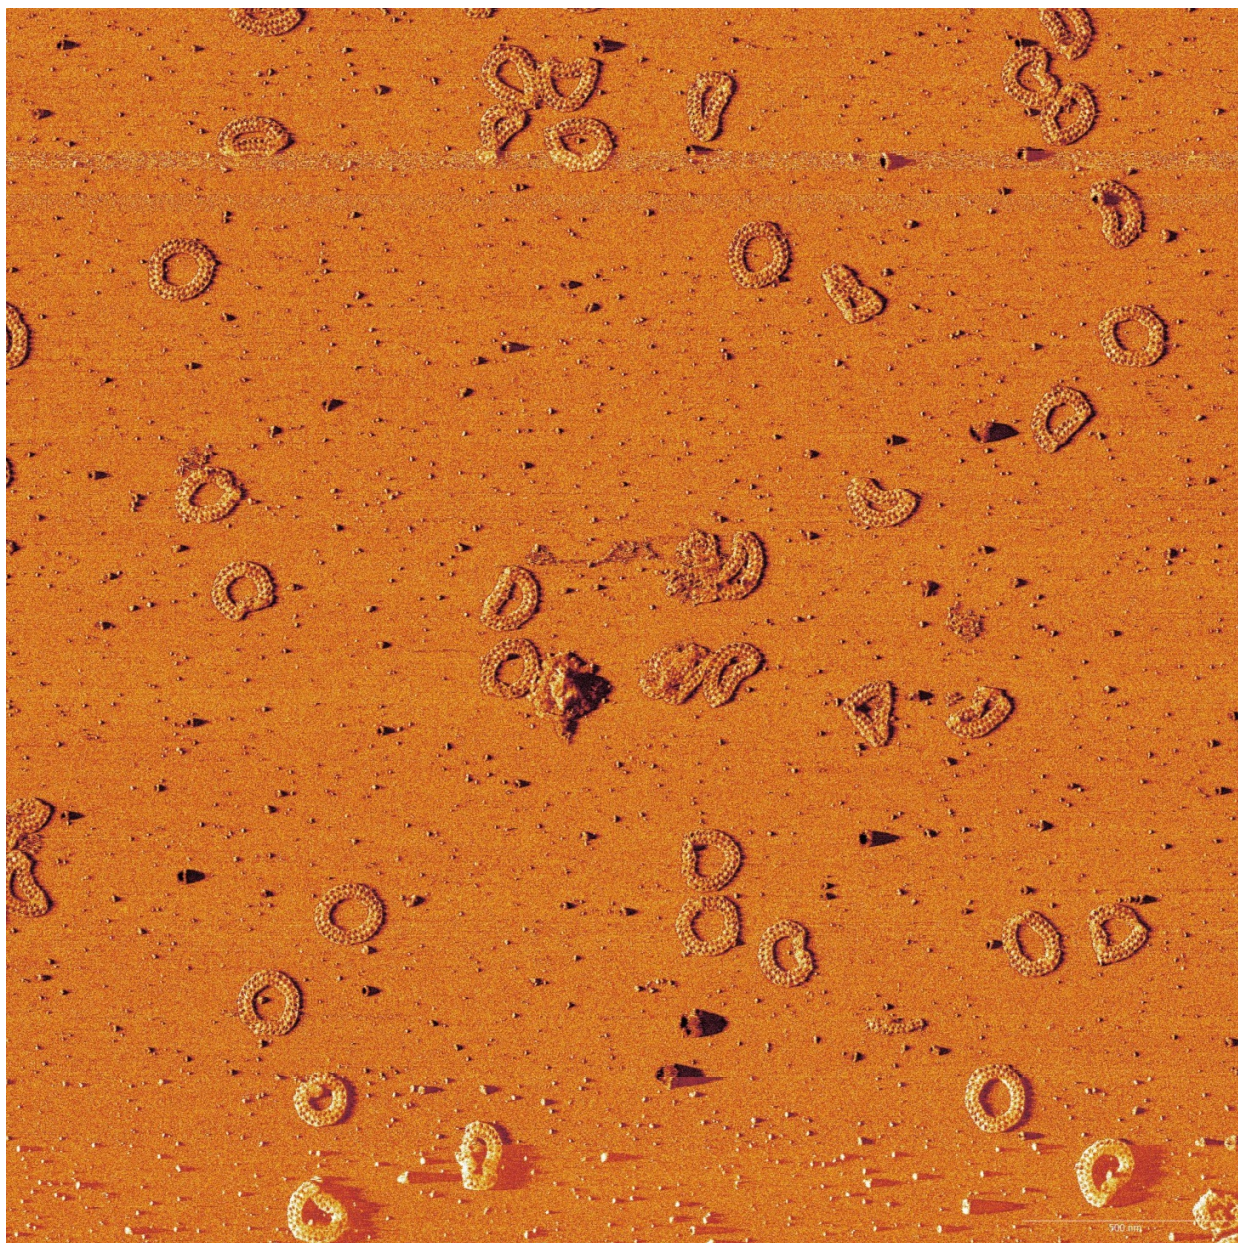

**Supplementary figure 10.** AFM image of Ring structure. Scale bar 500 nm



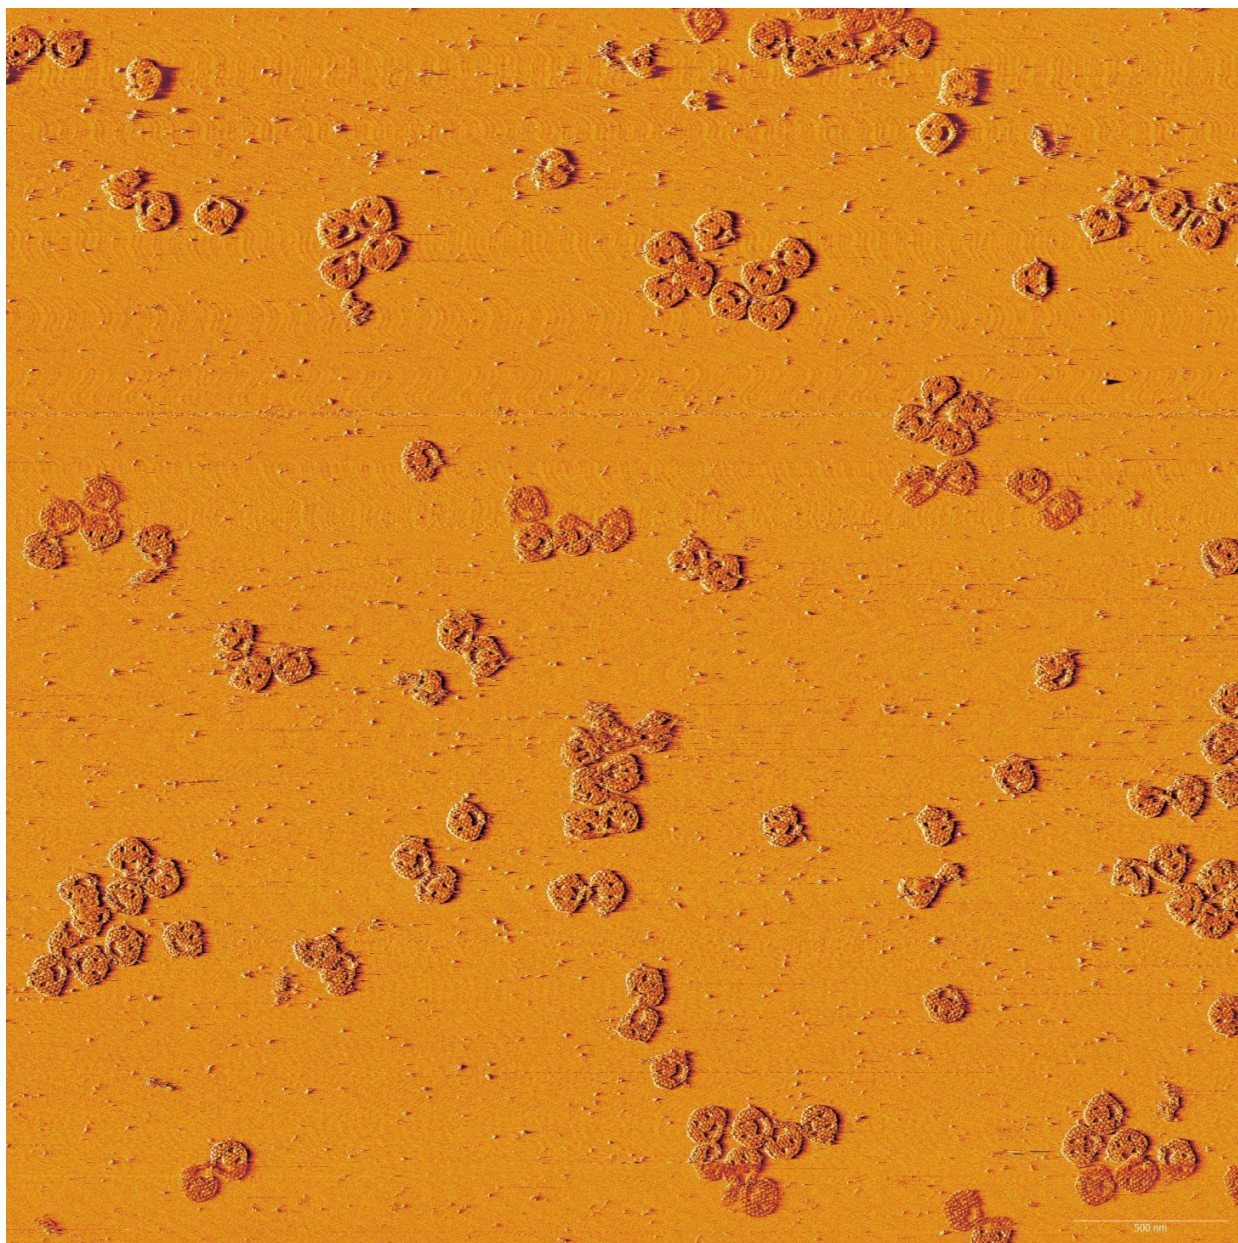

**Supplementary figure 11.** AFM image of Three-hole disc structure. Scale bar 500 nm



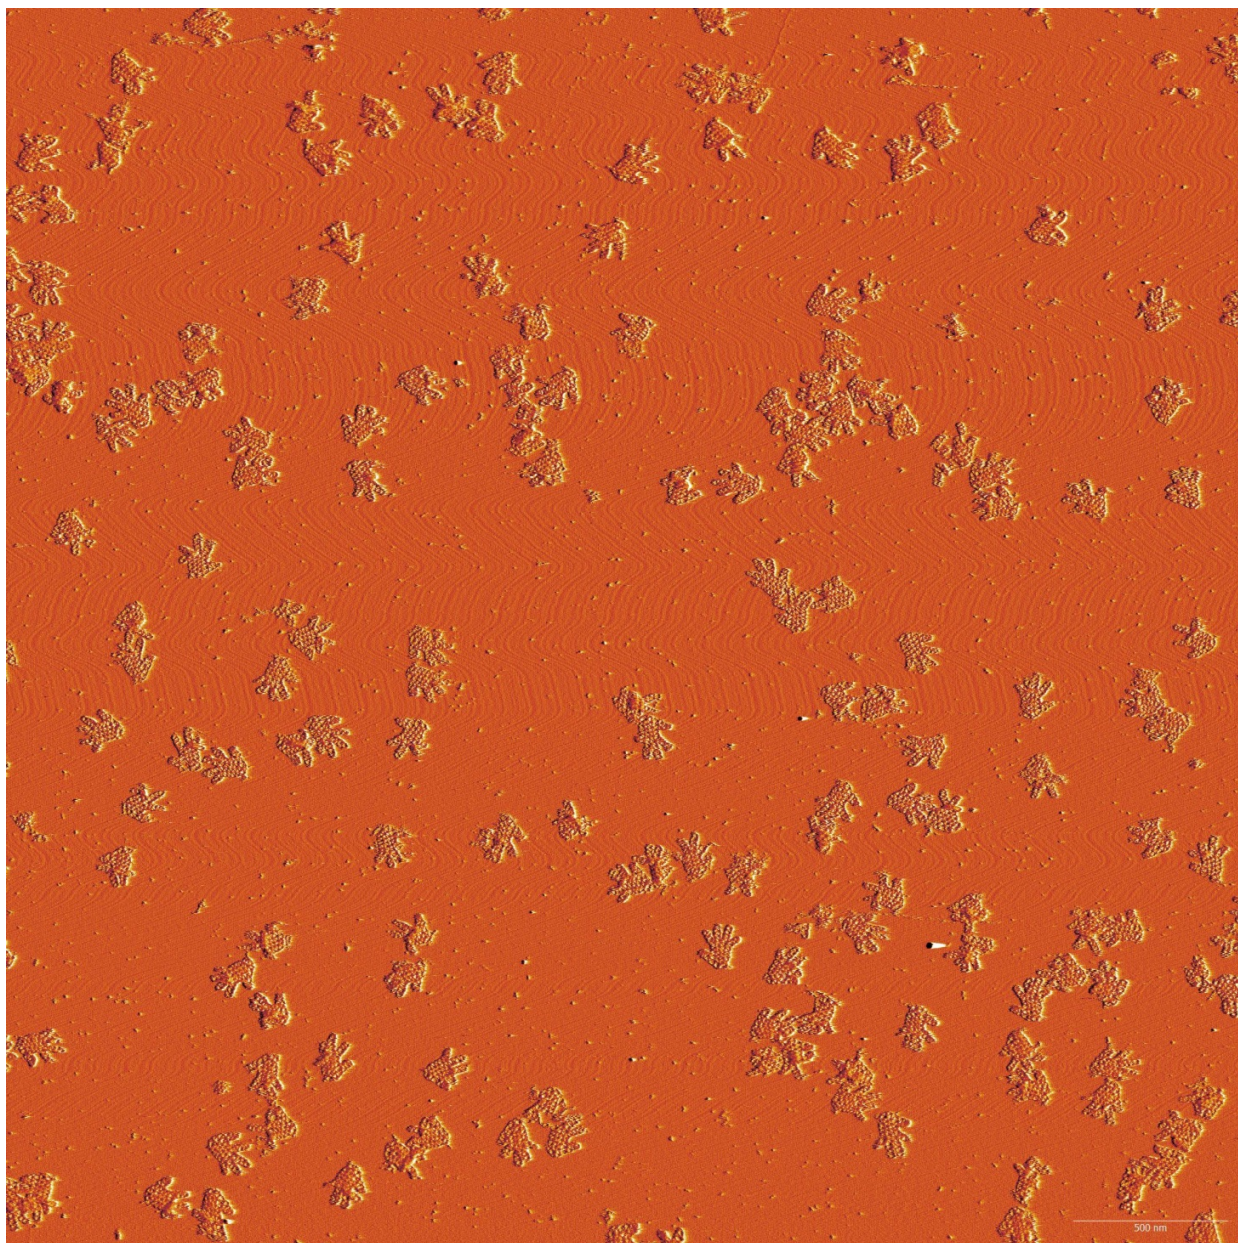

**Supplementary figure 12.** AFM image of Hand structure. Scale bar 500 nm



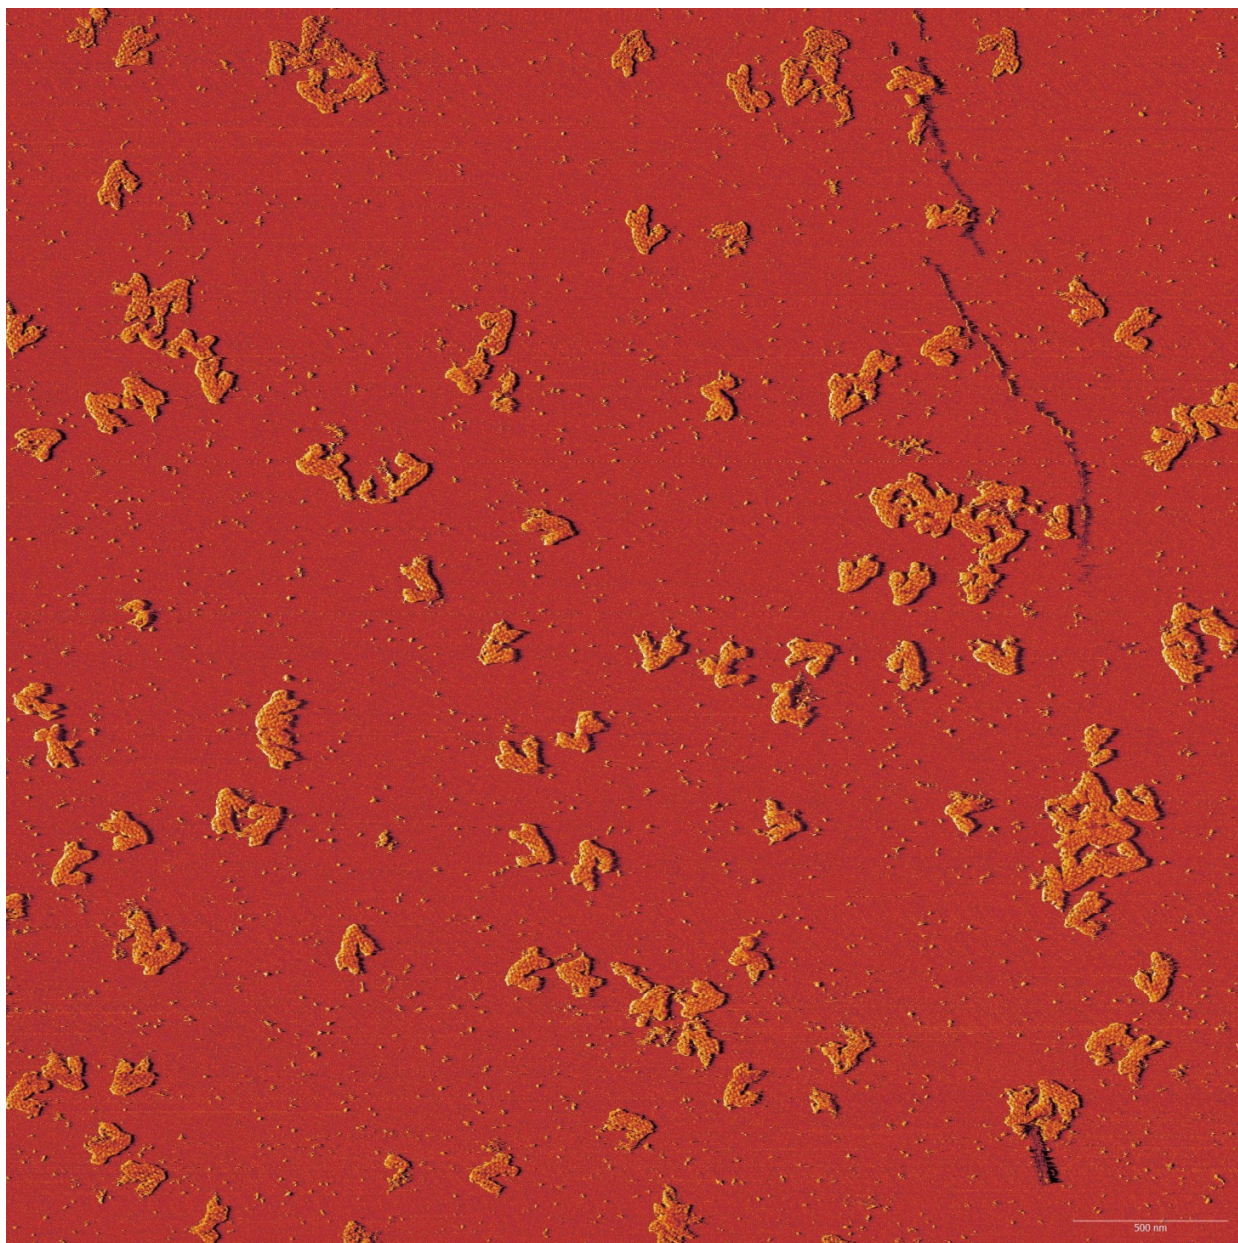

**Supplementary figure 13.** AFM image of map of Scandinavia structure. Scale bar 500 nm

**Supplementary table 3.** Staple strand sequences for folding the 6-tesselation flat sheet.

|                                            |
|--------------------------------------------|
| ACAACCCGTCGGATTCTCCGTGGGAACAAACGGCGGATTG   |
| TTCCTGTAGCCAGCTTTCATCAACATTAATGTGAGCGAGTA  |
| ACCAATAGGAACGCCATCAAAAATAATTCGCGTCTGGCC    |
| AATTACGAGGCATAGTAAAAATCAGCTCATTTTTTA       |
| GCATTAATTTTTGTTAGAGCAACTATCATA             |
| ACCCTCGTTTACCAGAATATTTGTTAAAATTC           |
| TTAAATTGTAACGTTAACGACGATAAAAACCAAAAT       |
| AGAAAAGCCCCAAAAACAGGAAGATTGTATAAGCAAATAT   |
| AAACTAGCATGTCAATCATATGTACCCCGTTGATAATC     |
| CCAATACTGCGGAATCGTTCGATGAACGGTAATCGTA      |
| TGGAGCAAACAAGAGAACATAAATATTCATTGA          |
| ATCCCCCTCAAATGCTATCATTGCCTGAGAGTC          |
| TCTACAAAGGCTATCAGGTTAAACAGTTCAGAAAACG      |
| TGATAAATTAATGCCGGAGAGGGTAGCTATTTTTGAGAGA   |
| AGTCAAATCACCATCAATATGATATTC AACCGTTCTAGC   |
| CAAAAAGATTAAGAGGAAGGTGAGAAAGCCGGAGAC       |
| AGGTAAAGATTCAAAAAGCCCGAAAGACTTCAA          |
| ATATCGCGTTTTAATTATGCCTGAGTAATGTGT          |
| CATATATTTAAATGCAACGAGCTTCAAAGCGAACCA       |
| GCCTTTATTTCAACGCAAGGATAAAAATTTTAGAACCTT    |
| CCAAAAACATTATGACCCTGTAATACTTTTGCGGGAGAA    |
| TTTTTGCGGATGGCTTAGTAAAGCTAAATCGGTTGTA      |
| AATAAAGCCTCAGAGCAAGCTTAATTGCTGAAT          |
| ATAATGCTGTAGCTCAAATTAGCAAATTAAGC           |
| ATACAGGCAAGGCAAGAACATGTTTTAAATATGCAA       |
| CAATTCTACTAATAGTAGTAGCATTAAACATCCAATAATC   |
| TAGCTATATTTTCATTTGGGGCGCGAGCTGAAAAGGTGGCAT |
| TTTGACCATTAGATACATTTGCGAAATGGTCAATAACCTGTT |
| CAGAGGCTTTGAGGACTAAAGTCTGCGAACGAGTAGATTTAG |
| AACAGTTGATTCCCAAACCTTTTTCATGAGGAA          |
| GTTTCCATTAACGGGAAAGTTTCATTCCATAT           |
| CTAAAGTACGGTGTCTGGTAAAATACGTAATGCCACT      |
| ATTATACCAAGCGGAAATCCTTTTGATAAGAGGTCA       |
| GAGTACCTTTAATTGCCAAAGTACAACGGAGA           |
| TTTGTATCATCGCTGACAGGTCAGGATTAGA            |
| GACCGGAAGCAAACCTCCAATAAATTGTGTCGAAATCC     |
| AACTTTGAAAGAGGACAGGAAGCAAAGCGGATTGCAT      |
| CTGACTATTATAGTCAATGAACGGTGTACAGA           |
| CCAGGGCATAGGCTGAAATCAGGTCTTTACC            |
| AGAATGACCATAAATCAAGCTGACCTTCATCAAGAGT      |
| CTTGCCCTGACGAGAACTGTTTAGACTGGATAGCGT       |
| GGGGTAATAGTAAAACCGAACGAGTAGTA              |
| AATTGGGCTTGAGATGAAGAAGTTTTGCCAGA           |
| AGCGAGAGGCTTTTGCAAGTTTAATTTCAACTTTAAT      |
| CTACGTTAATAAAAACGAAGATACATAACGCCAAAAGG     |
| CCACATTCAACTAATGCAACTAACGGAACAACATTATT     |
| ACCGTAATGGGATAGGTCAGTTGAGATTTAGGAATA       |
| ACAGGTAGAAAGATTACATCGTTGGTGTAGATGGCG       |
| GCCCGGAATAGGTGATCGGACGTTGGGAAGAAAAAT       |
| GCTCATTATACCAGTCAACCGTACTCAGGAGGT          |
| TTAGTACCGCCACCCTGCGATTTTAAGAAGCTG          |
| CATTGTGAATTACCTTATCAGAACC GCCACCCTCAGA     |

|                                            |
|--------------------------------------------|
| ACACTGAGTTTCGTCACCGCTCATTCACTGAATAAGG      |
| TCAACGTAACAAAGCTAGTACAACTACAACG            |
| CCTGTAGCATTCCACAATATTCATTACCCAAA           |
| AATCTTGACAAGAACCGGGACAGCCCTCATAGTTAGC      |
| ACAACCTTCAACAGTTTCTAAGGGAACCGAAGTACC       |
| CGCAGACGGTCAATCAAGCGGAGTGAGAATAG           |
| AAAGGAACAACCTAAAGCTTAGCCGGAACGAGG          |
| GCGACCTGCTCCATGTTAGAATTGCGAATAATAATTT      |
| CTTTCGAGGTGAATTTCTTCATCTTTGACCCCGAGG       |
| GAATACACTAAAACACTAAACAGCTTGATACC           |
| GATAGTTGCGCCGACAAACGAAAGAGGCAAAA           |
| ACGAAGGCACCAACCTAAATGACAACAACCATCGCCC      |
| CAGCAGCGAAAGACAGCATCGGAACGAGGGTAGCAACGGCTA |
| AGCCAGCAAAATCACCAGTAGCTTTTGCGGGATCGTACCCT  |
| CAGGGAGTTAAAGGCCACCATTACCATTAGC            |
| AAGGCCGGAACGTCAACGGTGCCTGAGGCTTG           |
| ACGCATAACCGATATATTCATGAAACCATCGATAG        |
| CATTTTCGGTCATAGCCCGTATCGGTTTATCAGCTTG      |
| AAAGGAGCCTTTAATTCCTTATTAGCGTTTGC           |
| CATCTTTTCATAATCACAATAAAAGGCTCCA            |
| TTTACGTTGAAAATCTCAAATCACCGGAACAGAGC        |
| AGCCGCCACCAGAACCACCTGTATGGGATTTTGCTAA      |
| TTAGTAAATGAATTTTACCAGAGCCGCGCC             |
| AGCATTGACAGGAGGTGTCGCTTTCCAGACG            |
| GTAACGATCTAAAGTTTTTGAGGCAGGTCAGACGATT      |
| CGTTCCAGTAAGCGTCATTAGGAACCCATGTACCGTA      |
| GGGATAGCAAGCCAAACATGGCTTTTGATGA            |
| TACAGGAGTGTACTGGACCACCTCATTITCA            |
| ACCGCCACCCTCAGAGCCTAATAAGTTTTAACGGGGT      |
| AAACATGAAAGTATTAAGGAGGGTTGATATAAGTATA      |
| GCGGATAAGTGCCGTCGAAAGGCTGAGACTCCTCAAGA     |
| GACAGTATCGCCTCAGGGGGTTTTGCTCAGTACCAG       |
| GAAGGATTAGGATTAGCGAAGATCGCACTCCAGCCAG      |
| TATTTATCCAATCCAATTCGGAACCTATTATTCTG        |
| TAATGCCCCCTGCCTAATAAGAAACGATTTTTT          |
| GTTTAAAGTCAAAAATTGCCCGTATAAACAGT           |
| CAGTGCCTTGAGTAACAGGAAAATAGCAGCCTTTACA      |
| GAGGGTAATTGAGCGCTAGCGCAGTCTCTGAATTTAC      |
| AAAGCCAGAATGGAAAATATCAGAGAGATAAC           |
| CCACAAGAATTGAGTTCAAATAAATCCTCATT           |
| GGCCTTGATATTCACAAAAGCCCAATAATAAGAGCA       |
| AAAGTTACCAGAAGGAAATCAGAGCCACCACCTCAG       |
| CTCAGAACCGCCACCCCGAGGAAACGCAATA            |
| ATAACGGAATACCCAACCTCAGAGCCGCCACC           |
| CACCACCGGAACCGCCTCAAGAACTGGCATGATTAAG      |
| ACGCAAAGACACCACGGATGTAGCGGTTTTTCATCGG      |
| GCCTTTAGCGTCAGACAATAAGTTTTATTTTGTG         |
| ACAATCAATAGAAAATCGACAGAATCAAGTTT           |
| CAGCACCGTAATCAGTAGTCATATGGTTTACCAGCGC      |
| GTGAATTATCACCGTACCGACTTGAGCCATTTGGAATTAG   |
| TGAGGAAGGTTATCTAAAATAGACGGAATTTATTCATTAAG  |
| GAGGGAAGGTAAATATTCTTTAGGAGCACTAA           |
| CAACTAATAGATTAGAAATCAACCGATTGAGG           |
| CAAAGACAAAAGGGGACAGCCGTCAATAGATAAT         |
| TTACCTTTTTTAAATGGAAGTGGAACATATAAAAGAA      |
| AAATACATACATAAAGACAGTACATAAATCAA           |

|                                         |
|-----------------------------------------|
| TATATGTGAGTGAATATGTTAGCAAACGTAGA        |
| ACTCCTTATTACGCAGTAAACCTTGCTTCTGTAAA     |
| AGATAAGTCCTGAACAAGAGTAAGCAGATAGCCGAAC   |
| AGCCCTTTTAAAGAAAAAATAATATCCCAT          |
| CCTAATTTACGAGCATATAGCTATCTTACCGA        |
| AGAAACAATGAAATAGCAGTAGAAACCAATCAATAAT   |
| CCGTTTTTATTTTCATCGAACACCCTGAACAAAGTCA   |
| ACGGGAGAATTAAGTGTAGGAATCATTACCGC        |
| GCCCAATAGCAAGCAACAGGGAAGCGCATTAG        |
| GAGAGAATAACATAAAAAATCAGATATAGAAGGCTTA   |
| CAAGATTAGTTGCTATTTACAAAATAAACAGCCATAT   |
| GAGCCTAATTTGCCAGTTATGCACCCAGCTACAATTTT  |
| AGCGCCATTGCCATTTCAGCTAACGAGCGTCTTTCCA   |
| ATCCTGAATCTTACCAACGGCTGCGCAACTGTTGGGA   |
| GGTGGTTCGAAATCGGCAGGTTTTGAAGCCTTAAAT    |
| ACCTCCCGACTTGCGGAAAAATCCCTTATAAAT       |
| CAAAGAATAGCCCGAACGAGGCGTTTTAGCGA        |
| TCCGGTATTCTAAGAACGGATAGGGTTGAGTGTGTT    |
| CAGGGCGATGGCCACTACTCATCGAGAACAAGCAAG    |
| TTAAACCAAGTACCGCGTGAACCATCACCAAAT       |
| TTATACAAATTCCTTACCAATTCGAAGAACGGGTA     |
| CGGCTGTCTTCTTATCGTATAAAGCCAACGCTCAA     |
| GCCAGTAATAAGAGAATAGCGCCTGTTTATCAACAAT   |
| GTTCAGCTAATGCAGAACATAAAGTACCGACAAAAGGT  |
| TCGTCGCTATTAATTACGACGACAATAAACAACAT     |
| AAAGTAATTCTGTCCAGATTTTCCCTTAGAATCCTTG   |
| TGGGTTATATAACTATATTAGGCAGAGGCATTTTCGA   |
| AACGCCAACATGTAATGTAAATGCTGATGCAAATC     |
| ATAATTAAGTAAAAAGCAAATCGCCATATTTAAC      |
| CAGTAGGGCTTAATTGAGCTGTTTAGTATCATATGCG   |
| CTTGACGGGAAAGCCGGAAGAATAAACACCGGAATC    |
| TAAATAAGGCGTTAAACGAACGTGGCGAGAAAGGA     |
| ATCAGAGCGGGAGCTAAAAATACCGACCGTGTGA      |
| TAAATTTAATGTTTTGACAGGAGGCCGATTAAA       |
| GGGATTTTAGACAGGAATTTTCATCTTCTGACC       |
| CAAATATATTTTAGTTACGGTACGCCAGAATCCTGA    |
| TCTGAGAGACTACCTTACGCGAGAAAATTTTT        |
| CAATCGCAAGACAAAGAATTTAACCTCCGGCTTAGGT   |
| GAAATTGCGTAGATTTTATTATCAAAATCATAGG      |
| AAGAGTCAATAGTAAACAGGTTTAAACGTCAGA       |
| TGAATATACAGTAACAAGATTAAGACGCTGAG        |
| AAAACATAGCGATAGCTTTACCTTTTACATCGGGAGA   |
| GTTACAAAATCGCGCAGATTTAACAATTTTATTGAA    |
| AAAACAAAATTAATTACAAGGCGAATTTTATTCAA     |
| ACATTTGAGGATTTAGTGATGAAACAAACATCAAG     |
| TTACCTGAGCAAAAAGAAGTATTAGACTTTACAAA     |
| GGAATTATCATCATATTCTGATTGCTTTGAATACCAA   |
| AACAATAACGGATTTCGCCACTGATTATCAGATGATGCC |
| TTTGATTAGTAATAACATAGTAAAACAGAAATAAA     |
| ATCAAAATTTTGCAAACTTGCTGAGTAGAA          |
| GAACTCAAATATCGGGTTAGAACCTACCAT          |
| CTTCTGAATAATGGAACTTGCTGGTAATATCCAGA     |
| TCATTTTGCAGAACAAAGATTGTTTGGATTATA       |
| AATTCATCAATATAATCCAGAAACCACAGAAAGGAGC   |
| AAAAGGGACATTCTGGCCAGTTTGAGTAACATTA      |
| ACGTTATTAATTTTAAACAGAGATAGAACCTTCT      |

|                                            |
|--------------------------------------------|
| ACAGTGCCACGCTGAGAGTAAATCCTTTGCCCGA         |
| CAATTCGACAACCTCGTATCAGCAGCAAATGAAAAATC     |
| ATCAATATCTGGTCAGTTGGCAAATCAACAGTTGAAAGGAAT |
| TAAAACAGAGGTGAGGCGGTACCTCAAATATCAAACCTCA   |
| TAAAGCATCACCTTGCTGAAGTATTAACACCGCCTGCA     |
| AACATCGCCATTAAAAATACCGAACGAACCACCAGCAGAAGA |
| TGAATGGCTATTAGTCTTTAATGCGCGAACTGATAGCCCTAA |
| TTATTTACATTGGCAGATTCAACGTGGCACAGACAATATTTT |
| GACCTGAAAGCGTAAGAACAGTCACACGACCAGTAAT      |
| ATGGAAATACCTACATTTTGACGCTCAATCGTCTGAAATGGA |
| ACAATATTACCGCCAGCCATTGCAACAGGAAAAACGCTC    |
| GTCTGTCCATCACGCAAATTAACCGTTGTAGCAATACTTC   |
| GAAGTGTTTTTATAATCAGTGAGGCCACCGAGTAAAAGA    |
| TTGCTTTGACGAGCACGTATAACGTGCTTTCCTCGTTAGA   |
| ACCCGCCGCGCTTAATGCGCCGTACAGGGCGCGTACTATGG  |
| ACCTCGATAAAGACGGAGACACGCTGCGCGTAACCACCAC   |
| CTGGCAAGTGTAGCGGATCCCCGGTACCGAGCTC         |
| AAATCGGAACCCTAAAAAAGCGGGCGTAGGGCG          |
| AGGGAAGAAAGCGAAAGGAGGGAGCCCCGATTTAGAG      |
| TGGACTCCAACGTCAAAGGTGCCGTAAAGCACT          |
| CAAGTTTTTTGGGGTCGAAGGGCGAAAAACGTCTAT       |
| ACGAGCCGGAAGCATAAAACCACTATTAAAGAACG        |
| CCAGTTTGGAACAAGAGTTGTAAGCCTGGGGTGCCT       |
| TCACCAGTGAGACGGGGCGAAAATCCTGTTTGT          |
| CGCTGGTTTCCCCAGCACAAACAGCTGATTGCCCTC       |
| CTGGCGAAAGGGGGATGTAAGTTGCAGCAAGCGGTCCA     |
| ACCGCCTGGCCCTGAGAGGCTGCAAGGCGATTAAGTT      |
| ACTGCCCGCTTCCAGTCAGGGTGGTTTTTCTTT          |
| GTTTGCGTATTGGGGCCAGGAAACCTGTCGTGCCAG       |
| CAGTGGGCCCTGCCATCCAACGCGGGGAGAGGCG         |
| CTGCATTAATGAATCGGCAGTAAGCAACTCGTCGGTGG     |
| TGAAATTGTTATCCGCCATTAATTGCGTTGCGCTC        |
| AATGAGTGAGCTAACTCATCACAATCCACACAACAT       |
| AATGAGTAAACAGGGCTTAATAGCTGTTTCTGTG         |
| GAATTCGTAATCATGGTCAAAGCTACGTGGTGCTTGTT     |
| CATAAATCATTCTCCGAACCTGACCTCCTGGTTGGTGT     |
| GCACGAATATAGGGGCCCTGAATCGGCTGACGCATTTCA    |
| CGACGGCCAGTGCCAAGCTGGAAGTACTCTATGATACCGA   |
| GGGTAACGCCAGGGTTTTCCAGTCACGACGTTGTAATA     |
| AGGGCGATCGGTGCGGGCACTTTCGCTATTACGCCAG      |
| CTTCCGGCACCGCTTCTAGGTGCCGAAACCAGGCAA       |
| CATCGTAACCGTGCATCTAGCCAGTTTGAGGGGACGAC     |

**Supplementary table 4.** Staple strand sequences for folding the 4-tesselation flat sheet.

|                                                 |
|-------------------------------------------------|
| AAAGGCTATCAGGTCATTGCCAATTTTGTAAAATTCGCATTA      |
| CATCAACATTAATGTGAATAGCTATTTTTGAGAGATCTAC        |
| TGATAAATTAATGCCGGAGAGGCGAGTAACAACCCGTCGGAT      |
| TCTCCGTGGGAACAAACGGCGTATGATATTCAACCGTTCTAGC     |
| CCGGAGACAGTCAAATCACCATCAAGATTGACCGTAATGGGATAGG  |
| GGGCGGTTGTGTACATCGAAAAAGATTCAAAGGGTGAGAAAGG     |
| AATGCCTGAGTAATGTGTAGGACATAAAAAAATCCCGTAAAA      |
| AAAGCCGCACAGGCGGCCTTTACCTCATATATTTTAAATGC       |
| CAACGCAAGGATAAAAAATTTTGAAGTGATGAAGGGTAAAGTTAA   |
| CGGTTTGCGTATTGGGCGAACTTTTGCGGGAGAAGCCTTTATTT    |
| AAAACATTATGACCCTGTAATCCAGGGTGGTTTTCTTTTCA       |
| CCAGTGAGACGGGCAACAGCTAAAGCTAAATCGGTTGTACCA      |
| TTAAGCAATAAAGCCTCAGAGCATAGATTGCCCTTACCAGCCTGGC  |
| AAATATCAAACCTCAATAAAGCAAGGCAAAGAATTAGCAAAA      |
| TTAACATCCAATAAATCATACCAATATCTGGTCAGTTGGCAA      |
| ATCAACAGTTGAAAGGAATTGAATTCTACTAATAGTAGTAGCA     |
| GCGCGAGCTGAAAAGGTGGCAAGGAAGGTTATCTAAAATATC      |
| TTCGCAAATGGTCAATAACCTTTTAGCTATATTTTCATTTGGG     |
| GGCTTATCCGGTATTCTAAGATAGTTTGACCATTAGATACAT      |
| CCAATTCTGCGAACGAGTAGAACGCGAGGGCTTTTAGCGAAC      |
| CTCCCGACTTGCGGGAGGTTTATTCATATAACAGTTGATTCT      |
| CTAAAGTACGGTCTGGAAGTTTATGAAGCCTTAAATCAAGAT      |
| AAGCGCAGTCTCTGAATTTACAAGCTCAACATGTTTTAAATATGCAA |
| AATTGCTGAATATAATGCTGTCGTTCCAGTAAGCGTCATACA      |
| TGGCTTTTGATGATACAGGAGTTTTCGGATGGCTTAGAGCTT      |
| TTGCTCCTTTGATAAGAGGTCAATGTACTGGTAATAAGTTTT      |
| TTGAGGACTAAAGACTTTTTCAAGTCAGGATTAGAGAGTACCTTAA  |
| GACCGGAAGCAAACCTCAACAATGAGGAAGTTTCCATTAAAC      |
| GGGTAAAATACGTAATGCCACTTCGAGCTTCAAAGCGAACCA      |
| AAGACTTCAAATATCGCGTTTTAAATACGAAGGCACCAACCTAA    |
| ACGGAACAACATTATTACAGGAACAAAAGATTAAGAGGAAGCCCGA  |
| TCAGAAGCAAAGCGGATTGCATAGAAAAGTTCATCAGTTGAG      |
| ATTTAGGAATACCACATTCAAGTCTTTACCTGACTATTATAG      |
| AATGACCATAAATCAAAAATCAATAATGCAGATACATAACG       |
| TCATTGAATCCCCCTCAAATTTTAAACAGTTCAGAAAACGAG      |
| ATAACCTCGTTTACCAGCTGCGGAATCGTCATAAATAT          |
| GTTTAGACTGGATAGCGTCCAATACGACGATAAAAACAAAATAGCG  |
| GCTTGCCCTGACGAGAAACACATGCCAGAGGGGGTAATAGTAAAAT  |
| AGAGGCTTTTGCAAAGAAGTTTGAACGAGTAGTAAATTGGG       |
| ACCTTATGCGATTTAAGATAGTAAGAGCAACACTATC           |
| CCAAAAGGAATTACGAGGACTGGCTCATTATACCAGTC          |
| TTGACCCCGAGGATTATCTACGTTAATAAAACGAACTA          |
| AGGACGTTGGGAAGAAAACCAAGCGCGAAACAAAGTA           |
| AAATCCGCGACCTGCTCCAACTTAATCATTGTGAATT           |
| CTTGAGATGGTTAATTTAAGTTACTTAGCCGGAACGAG          |
| TTTGAAGAGGACAGATGAAGCTGCTCATTCAAGTGAATAAG       |
| CATTACCAAATCAACGTAACAAAACGGTGTACAGACCAGGCGCATA  |
| TTTCAGCGGAGTGAGAATAGAATAATCTTGACAAGAACC GGATATT |
| GGCTGGCTGACCTTCATCAAGAGGGAACAACTAAAGGAATTG      |
| AGGCTCAAAGGAGCCTAAGGGAACCGAACTGACCAAC           |
| GCGCAGACGGTCAATCATAAATTGTATCGGTTTATCAG          |
| GATAGTTGCGCCGACAATACGCCTGATAAATTGTGTGCG         |
| CAACGGAGATTTGTATCAAACAACCATCGCCACG              |
| TAAAGGCCGCTTTTTCGGATACACTAAAACACTCATCT          |



|                                                 |
|-------------------------------------------------|
| AACGAAAGAGGCAAAGAAATCGTCACCCTCAGCAGCGA          |
| CAGTTAATGCCCCCTGCCAGTAGCAACGGCTACAGAGGCT        |
| AAGACAGCATCGGAACGAAATTCGGAACCTATTATTC           |
| AGAAGGATTAGGATTAGCAGCTGAGGCTTGCAGGGAGT          |
| CATAACCGATATATTCGGAGGGTTTTGCTCAGTACCAG          |
| CCCGGAATAGGTGTATCAATCTTAAACAGCTTGATACC          |
| CTTGCTTTGAGGTGAATACGTACTCAGGAGGTTTAGT           |
| CTCAGAGCCACCACCCTCATTGAAAATCTCCAAAAAAA          |
| CGAATAATAATTTTTCAAATTCAGGGATAGCAAGCCC           |
| AGTACAAACTACAACGCCAATTGCTAAACAATTTCAACAG        |
| TAAATGAATTTTCTGTATGGGATTGTAGCATTCCACAGACAGCCCTC |
| TAAATATTGACGGAAATTATTATTTTTCGCTTTCCAGACGTTAG    |
| ATAGTTAGCGTAACGATCTAAAGTTAAAGGTGAATTATCACC      |
| ATCACCAGTAGCACCATTAAAACACTGAGTTTCGTACC          |
| AATAGGAACCCATGTACCACATTAGCAAGGCCGGAAC           |
| TAGCGACAGAATCAAGTTACACCCTCAGAACGCCACC           |
| ACCGCCACCCTCAGAACCAGCCTTTAGCGTCAGACTGT          |
| ATTAGCGTTTGCCATCTTAAGGGTTGATATAAGTATAG          |
| GCGGATAAGTGCCGTGAATCATAATCAAAATCACCGG           |
| CCACCCTCAGAACCGCCAAGAGGCTGAGACTCCTCAAG          |
| TGAAACATGAAAGTATTAACCTCAGAGCCACCACCCTC          |
| ATTGACAGGAGGTTGAGGAAGTAACAGTGCCCGTATAAA         |
| AACGGGGTCAGTGCCTTGAGGTCAGACGATTGGCCTTG          |
| ATCTTACCAACGCTAACGCCTCATTAAAGCCAGAATGGA         |
| ATATTCACAAACAAATAAAGCGTCTTTCCAGAGCCTAA          |
| CAATCAAATAAGAAACGACACCAGAGCCGCCGCCAGC           |
| AGAGCCGCCACCAGAACCATTTTTTTGTTAACGTCAA           |
| AACAGGGAAGCGCATTAGAACCCTCCCTCAGAGCCG            |
| AACCAGAGCCACCACCGGACGGGAGAATTAAGTGAACA          |
| AGAGAGATAAACCACAAGATTTTCGGTCATAGCCCCCTT         |
| AGCGCGTTTTTCATCGGCAAATTGAGTTAAGCCCAATAA         |
| CCGAAGCCCTTTTTAAGAAATAGCAGCACCGTAATCAG          |
| GTCACCAATGAAACCATCAAAGTAAGCAGATAGCCGAA          |
| CGGAATACCCAAAAGAACAGGGAATTAGAGCCAGCAA           |
| GTCACCGACTTGAGCCATAGCATGATTAAGACTCCTTA          |
| AAGGTGGCAACATATAAAAAACCGATTGAGGGAGGGAAGG        |
| GCCAAAGACAAAAGGGCGACATTAGAAACGCAAAGACACCACGGAAT |
| TATGTAATGCTGATGCAAATAAGAAAATTCATATGGTTTACCAGC   |
| AAGTTTATTTTGTCAATCAATCAATCGCAAGACAAAGAAC        |
| TCTTCTGACCTAAATTTAAACGTAGAAAATACATACATA         |
| TTACGCAGTATGTTAGCAAGGTTTGAATACCGACCGT           |
| CATAATTACTAGAAAAAGACGAGGAACGCAATAATAA           |
| CAAAGTTACCAGAAGGAAACTGTTTAGTATCATATGCG          |
| AGTAGGGCTTAATTGAGAAAATAGCAATAGCTATCTTA          |
| TAAGAGCAAGAAACAATGATCGCCATATTTAACAACGC          |
| ATAAGAGAATATAAGTAAGTAATTGAGCGCTAATATC           |
| CCCTGAACAAAGTCAGAGACGACAAAAGGTAAGTAAT           |
| ATGCAGAACGCGCCTGTTAACAGAGAGAATAACATAAA          |
| AATGAAAATAGCAGCCTTAATCAACAATAGATAAGTCC          |
| ATGTAGAAACCAATCAATAACAGCCATATTATTTATCC          |
| TTTGCCAGTTACAAAATAAATCGGCTGTCTTTCTTAT           |
| CGAGAACAAGCAAGCCGTAAGCTACAATTTTATCCTGA          |
| TAGTTGCTATTTTGCACCAATTTATTTTCATCGTAGGAA         |
| TTTAGGAGCACTAACAATAAGCAAGCAAATCAGATATAGAA       |
| TCATTACCGGCCCAATAAAGATTAGAGCCGTCAATAG           |
| ACAATTCGACAACCTCGTAAAACCAAGTACCGCACTCAT         |

|                                                  |
|--------------------------------------------------|
| CATTCCAAGAACGGGTATAAAATCCTTTGCCGAACGT            |
| GGAAACAAAGAAACCACCAACCCATCCTAATTTACGAGC          |
| TGAACAAGAAAAATAATAAAGGAGCGGAATTATCATC            |
| AATCCTGATTGTTTGGATATAAACAACATGTTACAGCTA          |
| TCTGTCCAGACGACGACAAATACTTCTGAATAATGGAA           |
| AACAGAAATAAAGAAATTAAGGCATTTTCGAGCCAGTA           |
| CAACATGTAATTTAGGCAACGTAGATTTTCAGGTTTAA           |
| GGAGAAACAATAACGGATATATAAAGCCAACGCTCAAC           |
| TTATACAAATCCTTACCAACGCCTGATTGCTTTGAATA           |
| CAATTACCTGAGCAAAGATAAGAATAAACACCGGAAT            |
| GTGATAAATAAGGCGTTAAGATGATGAAACAACATCA            |
| TTACCTTTTTAATGGAAATATATTTAGTTAATTTCA             |
| GCGAGAAAACTTTTCAAACAGTACATAAATCAATATATG          |
| ACTACCTTTTTAACCTCCGGCAATTAGGTTGGGTTATATACTA      |
| TGAGTGAATAACCTTGCTTCTATCAAATCATAGGTCTGAGAG       |
| TGAGAAGAGTCAATAGTGAATTTAGTAAATCGTCGCTATTAATTAATT |
| CTGAGAAGTGTTTTATAATCATAGCGATAGCTTAGATTAAGACGC    |
| TTCCCTTAGAATCCTTGAAAACAGTGAGGCCACCGAGTAAAAGA     |
| GTCTGTCCATCAGCAAATTAATTTAACAATTTCAATTTGAA        |
| AGAAAACAAAATTAATTAACCGTTGTAGCAATACTTCT           |
| TCAAACATATCGGCCTTGCAAGAGGCGAATTATTCATTT          |
| CCAAGTTACAAATCGCGAGGTAATATCCAGAACAATA            |
| AATACCTACATTTTGACGAAACAGTACCTTTTACATCG           |
| CGTCAGATGAATATACAGATCAATCGTCTGAAATGGAT           |
| ATAAAAGGGACATTCTGGACAAAATTTTGCACGTAA             |
| GGGTTAGAACCTACCATAACAACAGAGATAGAACCCTT           |
| TTTTTGAATGGCTATTAGAGATGGCAATTCATCAATAT           |
| ATATTCCTGATTATCAGAACTTAATGCGCGAACTGAT            |
| ACCAGCAGAAGATAAAACAAGTAACATTATCATTTTGC           |
| TATTAATTTTAAAAGTTTAGAGGTGAGGCGGTCAGTAT           |
| GCAATGAAAAATCTAAAAGAAGTATTAGACTTTACAA            |
| ATAATACATTTGAGGATTAACATCACCTTGCTGAACCTC          |
| CCTGAGAGAGTTGCAGCAAGCAGCCACGCTGAGAGCCAGCA        |
| TAACACCGCCTGCAACAGAGTCCACGCTGGTTTGCCCC           |
| GCAAAATCCCTTATAAATATAAAAATACCGAACGAACC           |
| AGCCCTAAAACATCGCCAAAAGAATAGCCCGAGATAG            |
| TTAAAGAACGTGGACTCCAATACGTGGCACAGACAATA           |
| CTGACCTGAAAGCGTAAGAACGTCAAAGGGCGAAAAAC           |
| CCAAATCAAGTTTTTTGGAACAGTCACACGACCAGTA            |
| TATTTACATTGGCAGATTAGTCGAGGTGCCGTAAGCA            |
| TTGACGGGAAAGCCGGCACAGAAAAACGCTCATGGA             |
| TTACCGCCAGCCATTGCAAACGTGGCGAGAAAGGAAGG           |
| TGTAGCGGTACGCTGCGACTTGCTGAGTAGAAGAAC             |
| TTGATTAGTAATAACATCAATAACCACCACCCCGCCGCGC         |
| TAAATGCGCCGCTACAGGGCGACAGGAACGGTACGCCAGAATC      |
| GAGGCCGATTAAGGGATTTTAGACGTAATGTTGCTTTGACGAGC     |
| CTGCATCAGACGATCCAGCGCAAGAATCAGAGCGGGAGCTAAACAG   |
| ACGTATAACGTGCTTTCCTCGTTAGTGTCACTGCGGCCTGTGC      |
| ACTCTGTGGTGCTGCGGCCAGAGCGCTAGGGCGCTGGCAAG        |
| GAAGAAAGCGAAAGGAGCAATGCGGCGGGCGTTTTCA            |
| TCTTCGCGTCCGTGAGCCAGGAGCCCCGATTTAGAGC            |
| CTAAATCGGAACCCTAAAACCTCACAGTTGAGGATCCC           |
| GTTTCTGTGTGAAATTGACCACTACGTGAACCATCAC            |
| CGTCTATCAGGGCGATGGAATCCGCTCACAATTCACA            |
| GTGCCTAATGAGTGAGCTATTGGAACAAGAGTCCACTA           |
| GTTGAGTGTTGTTCCAGAACTCACATTAATTGCGTTG            |

|                                                  |
|--------------------------------------------------|
| CCAGCTGCATTAATGAATAGATGGTGGTTCCGAAATCG           |
| AGCAGGCGAAAATCCTGTAAGCCAACGCGCGGGGAGAGG          |
| ACGATGCTGATTGCCGTTCCGAAGTCGGGAAACCTGTCGTG        |
| CGCTCACTGCCCGCTTTCACAAACGCGGTCCGTTTTTT           |
| ATAACGGAACGTGCCGAAATAAAGTGTAAGCCTGGG             |
| CAACATACGAGCCGGAAGATGTAGAACGTCAGCGTGGT           |
| CAGCACGTCGGTGGTGACGTAATCATGGTCATAGCT             |
| CGGGTACCGAGCTCGAATATCCCACGCAACCAGCTTAC           |
| CTTTCGCACTCAATCCGCATGCCAGCACGCGTGCTGT            |
| CGGTACATACCGGGGGTTAAGGCGCGGTTGCGGTATGAGCC        |
| GGGTCCTGTTGCCCTGCGGCAAGCCAGCGGTGCCGGTGCCCC       |
| GGCATCAGATGCCGGTTACCTGATGGTAATGGGTAAGGTTTCTTG    |
| TTTCCAGTCACGACGTTGTAATGGTGTGTTAGCAAATCGTTAAC     |
| CTCGTCATAAACATCCCTTACACAACGACGGCCAGTGCCAAGCT     |
| TTCAGAGGTGGAGCCGCCAAGCGGGGTCATTGCAGGCG           |
| GGCTGGAGGTGTCCAGCAAGAACGGATAACCTCACCGG           |
| CCCGAATTTGTGAGAGAAACCGCAAGAATGCCAACGG            |
| GCTGGTCTGGTCAGCAGCAAGACTTCTCCGTGGTGAA            |
| GATCAAACCTAAATTTCTACCGCCAGAGCACATCCTC            |
| CGTCTCGTCGCTGGCAGCAATCATTGCGCCAGCAGTT            |
| TCACGTTGGTGTAGATGGGCGAAGAGACGCAGAAACAGCG         |
| GGGATAGCTCTCACGAAAATCGTAACCGTGCATCTGC            |
| TCGCACTCCAGCCAGCTTACAGCGCCATGTTTACCAGT           |
| AAACAATCGGCGAAACGTAACGGCACCGCTTCTGGTGCCGG        |
| AAACCAGGCAAAGCGCCATTACATAAGTTGGGTAACGCCAGGGT     |
| AAGGGGGATGTGCTGCAAGGCGAAGCCATTACGGCTGCGCAACTGTTG |
| AATTTTTGTTAAATCAGCTCAACTTCGCTATTACGCCAGCTGGCGA   |
| GGAAGGGCGATCGGTGCGGGCCTTTTTAAACCAATAGGAACGCC     |
| ATCAAAAATAATTCGCGTCTGAAGTATCGGCCTCAGGAAGA        |
| CAGTTTGAGGGGACGACGACCTTCTGTAGCCAGCTTT            |

**Supplementary table 5.** Staple strand sequences for folding the 3-tesselation flat sheet.

|                                        |
|----------------------------------------|
| TATCAGGTCATTGCCCGTGCATCTGCCAGTTT       |
| GGGCGAAAAACCGTCTAAGAGAGATCTACAAAGGC    |
| GGAGAGGGTAGCTATTTTAAATCAGGGCGATGGCCCA  |
| GAGGGGACGACGACAGTAGCTGATAAATTAATGCC    |
| ATATGATATTCAACCGTTTATCGGCTCAGGAAGATC   |
| GGAAACCAGGCAAAGCGCGACAGTCAAATCACCATCA  |
| AAAAGGGTGAGAAAGGCCATTTCGCCATTCAGGCTGC  |
| GCTATTACGCCAGCTGGCAAATGTGTAGGTAAAGATTG |
| TTTAAATGCAATGCCTGAAAGGGGGATGTGCT       |
| ATAAGGGAACCGAACTAAAAATTAGAACCCTCATATAT |
| AACGCAAGGATAAAAAATTGACCAACTTTGAAAGA    |
| GCAAGGCGATTAAGTTCGGGAGAAGCCTTTATTTT    |
| GACCCTGTAATACTTTTTCGGCGAAACGTACAGC     |
| GGACAGATGAACGGTGGTTGTACCAAAAACATTAT    |
| GAGCATAAAGCTAAATCGAAGGCTTGCCCTGACG     |
| GCCATGTTTACCAGTCATTAAGCAATAAAGCCTCA    |
| AGGCAAAGAATTAGCAAACAGCAGTTGGGCGGTT     |
| AGAAACACCAGAACGACCAATAAATCATAACAGGCA   |
| TAGTAGTAGCATTAAACATAAAATCTACGTTAATA    |
| GTGTACATCGACATAAGTGGCATCAATTCTACTAA    |
| GGGGCGCGAGCTGAAAAGCGCTGGCAGCCTCCGG     |
| AAACGAACTAACGGAATTTAGCTATATTTTCATTT    |
| CAAATGGTCAATAACCTGAACACTATCATAACCC     |
| CCAGAGCACATCCTCAGACCATTAGATACATTTG     |
| GAACGAGTAGATTTAGTTTCCAGCTTACGGCTGGA    |
| TCGTTTACCAGACGACAGTTGATTCCCAATTCTGC    |
| AGTTTCATTCCATATAACATATAATGCTGTAGCTCAA  |
| GGTGTCCAGCATCAGCCTAAAGTACGGTGTCTGGA    |
| CATGTTTTAAATATGCAAGAGAGTACCTTTAATTGCT  |
| AGAGCTTAATTGCTGATGGATAGCGTCCAATACTG    |
| TGCTTTAAACAGTTCAGATTTTTCGGGATGGCTT     |
| CCTTTTGATAAGAGGTCAAATATCGCGTTTAATTC    |
| CAACAGGTCAGGATTATCATAAACATCCCTTACAC    |
| GGGTTACTGTCAGCCAGCGACCGGAAGCAAATC      |
| GAGCTTCAAAGCGAACCAGGAACAAAGAAACCAC     |
| GGAAGCCGAAAGACTTCAAACGAGAATGACCATAAA   |
| CAGAAGGAGCGGAATTTGCATCAAAAAGATTAAGA    |
| CAGAAGCAAAGCGGATATTAATTAATTTCCCTTA     |
| GCTGAGAAGAGTCAATAGCCCTGACTATTATAGT     |
| TCAAAAATCAGGTCTTTATAATTTTTTTCACGTTG    |
| AAAATCTCAAAAAAATCATTGAATCCCCTCAA       |
| CGGAATCGTCATAAATATTGCCACGCATAACC       |
| ATAGTAAAATGTTTAGACGATAAAAACCAAATAGCG   |
| GATATATTCGGTTCGCTAGTTTTGCCAGAGGGGGTA   |
| AGAGGCTTTTGCAAAAGACATAACGCCAAAAGGAATT  |
| ACGAGGCATAGTAAGAGCCAACATTATTACAGGTAGA  |
| TCAACTAATGCAGATAAAGACTTTTTCATGAGGAA    |
| GAAGGCACCAACCTAAAATTTAGGAATACCACAT     |
| AAGATTCATCAGTTGAGAGAAGTGGCTCATTATACCA  |
| GTCAGGACGTTGGGAAGAGTAGTAAATTGGGCTTGAG  |
| CCTTATGCGATTTTAAACGAAAGAGGCAAAAAGAATA  |
| CAAGCGCGAAACAAAGTATAATCATTGTGAATTA     |
| ATGGTTTAATTTCAACTTCCCAAATCAACGTAACAAA  |
| GCTGCTCATTCAAGTGAATTACAGACCAGGCGCATAGG |

|                                            |
|--------------------------------------------|
| AACCGGATATTCATTACAACGGAGATTTGTATCAT        |
| CATGTTACTTAGCCGGGAGTAATCTTGACAAG           |
| CTGGCTGACCTTCATCAAAGCGCAGACGGTCAATC        |
| AGGAGTGTACTGGTAAAAAAAATCCGCGACCTGCTC       |
| CGCCTGATAAATTGTGTCTAAGTTTTAACGGGGT         |
| CAGTGCCTTGAGTAACTGACCCCGCAGGATTATAC        |
| CACTAAAACACTCATCTTGCGGGGTTTTGCTCAG         |
| TACCAGGCGGATAAGTAAATACGTAATGCCACTAC        |
| GTTTCCATTAAACGGGTAACGAGGGTAGCAACGGCTA      |
| CAGAGGCTTTGAGGACTAGAGGCTTGACGGGAGTTAA      |
| GAAAGACAGCATCGGACTCAGAACCGCCACCCTCA        |
| GGATAGCAAGCCCAATAGCGTCACCCTCAGCAGC         |
| AGGCCGCTTTTGCGGGATTTGATACCGATAGTTGCGC      |
| CGACAATGACAACAACCAAGGCTCCAAAAGGAGCCTT      |
| GAATTTCTTAAACAGCGAACCCTGTACCGTAACA         |
| GCATCCACAGACAGCCAGCTTGCTTTGAGGGT           |
| TAATTGTATCGGTTTATCGAGAATAGAAAGGAACAAC      |
| TAAAGGAATTGCGAATAAGAATTTATCAAAATCA         |
| CAACAGTTTCAGCGGAGTTCATAGTTAGCGTAACGAT      |
| TAGGTCTGAGAGACTAGATTTTGCTAAACAACCTT        |
| TGAATTTCTGTATGGAGCAAATCAGATATAGAAG         |
| GAACTCCCGACTTGCGGTCCAGACGTTAGTAAA          |
| CTAAAGTTTTGTCGCTTAAAGGTAATATTGACG          |
| GAAATTATTCAAAAACAACTACAACGCCTGTA           |
| CTGAGTTTCGTCACCAGTCATCGATAGCAGCACC         |
| GTAATCAGTAGCGACACCACCACCTCATTTTCAG         |
| GAACCGCCACCCTCAGAGACCAGAGCCACCACCG         |
| AGGTTTAGTACCGCCACCGCCGTCGAGAGGGTTGATA      |
| GAACCGCTCCCTCAGGTGTATCACCGTACTCAGG         |
| TAAGTATAGCCCGGAATAAAGAGGGCTGAGACTCCTCA     |
| AGAGAAGGATTAGGATTAAGTGCCCGTATAAACAGTT      |
| GAAACATGAAAGTATTGATATTCACAAACAATAA         |
| TACCGTTCCAGTAAGCGTCATCGAACCTATTATTCT       |
| AATGCCCCCTGCCTATTTATGGCTTTTGATGATAC        |
| CACCACCAGAGCCGCGCCAGAGGAAAGCGCAGTCTCTGAATT |
| ATCCTCATTAAAGCCAGAATTGACAGGAGGTTGAGGC      |
| AGGTCAGACGATTGGCCTGCCGCCACCCTCAGAACCG      |
| GGTCATAGCCCCCTTAAACCTCAGAGCCGCCACCAGAAC    |
| CCACCCTCAGAGCCACCATAGCGTTTGCCATCTTTTC      |
| ATAATCAAAATCACCGGAGAATCAAGTTTGCTTTAG       |
| ATCACCAGTAGCACCAAAAAAATTCATCGGCATTTTC      |
| CGTCAGACTGTAGCGGTTTACCATTAGCAAGGCCGG       |
| AAACGTCACCAATGAAACGGTGAATTATCACCGTAC       |
| ATGTTTACCAGCGCCAAAAAATTAGAGCCAGCAAA        |
| CGACTTGAGCCATTTGGGAAGACAAAAGGGCGACATT      |
| CAACCGATTGAGGGAGGGAGGTTTTGAAGCCTTA         |
| AATCAAGATTAGTTGCTCAATAGAAAATTCAT           |
| GAATAAGTTTATTTTGTCTATTTTGCACCCAGCTACA      |
| TTCCAGAGCCTAATTTGCAGAAACGCAAAGACACCACG     |
| TAAAGTGGCAACATATACAGTTACAAAATAAACAGC       |
| TGTTTAAACGTCAAAAATGAAACGTAGAAAATACATACA    |
| TTATTACGAGTATGTTAAAAATAGCAGCCTTTACAG       |
| GAGAATTAAGTAAACCCCTGGCATGATTAAGACTCC       |
| ACGGAATACCCAAAAGATGAACAAAGTCAGAGG          |
| ACAAGAATTGAGTTAAAGGAAACGCAATAATA           |
| AAGTTACCAGAAGGAAACCAATAATAAGAGCAAGAA       |

|                                           |
|-------------------------------------------|
| AACGCCAACATGTAATAAAAAAAGCAGATAGCCGAACA    |
| CTTTTAAAGAAAAGTAAGGCAGAGGCATTTTCGAG       |
| AAGTAATTCTGTCCAGACCTATCTTACCGAAGCC        |
| ACAATGAAATAGCAATAGAGGGAAGCGCATTAGACGG     |
| GTAATTGAGCGCTAATAATCAGAGAGATAACCC         |
| AGAGAATAACATAAAAAACGACGACAATAAACCAAC      |
| ATGTTCAAGCTAATGCAACAAATAAGAAACGATTTTT     |
| CATATTATTTATCCCAATTATCATTCCAAGAACG        |
| GGTATTAACCAAGTAACCAACGCTAACGAGCGTCT       |
| ATTTATCCTGAATCTTAGAACGCGAGGCGTTTTAGC      |
| GCTTATCCGGTATTCTAACCGCACTCATCGAGAACA      |
| ACCGCGCCAATAGCACCTTTTTAACCTCCGCTT         |
| AATCCAATCGCAAGACAACATCGTAGGAATCATT        |
| GCAAGCGTTTTTATTTTGCATGTAGAAACCAATCAA      |
| TAATCGGCTGTCTTCTGAAACGCGCTGTTTATCAA       |
| CCATCCTAATTTACGAAGAACGCGAGAAAACTTTT       |
| ATTTAATGGTTTGAATACAAGAAAAATAATATC         |
| CAATAGATAAGTCCTGAAAAAGTACCGACAAAAGGTA     |
| CCAGTAATAAGAGAATATCCGACCGTGTGATAAA        |
| TAAGGCGTTAAATAAGAATCGCCATATTTAAC          |
| TCAACAGTAGGGCTTAAATAAACACCGGAATCATA       |
| AATACCAAGTTACAAAAAAAAGTATAAAGCCAACGC      |
| TTATACAAATCTTACCGCGCAGAGGCGAATTATT        |
| AACATCAAGAAAACAAAATTTAGTATCATATGCG        |
| ATTACTAGAAAAAGCCTGATTTTCATCTTCTGACCTAA    |
| TCAAATATATTTTAGTTATTAATTACATTTAACA        |
| ATTTCAATTTGAATTACATATGTAATGCTGATGCA       |
| AGGTTGGGTTATATAACTCGATAGCTTAGATTAAGAC     |
| GAATCCTTGAAAACATAGCTTTTTAATGGAAACAGT      |
| TTCTGTAATCGTCGCATCATATTCCTGATTA           |
| TTGGATTATACTTCTGAAGAGTGAATAACCTTGC        |
| ACATAAATCAATATATGTAAGAAGATGATGAAACA       |
| CATTTCAATTACCTGAGCTAATGGAAGGGTTAGA        |
| ACCTACCATATCAAAATCGCCTGATTGCTTTG          |
| ATCGGGAGAAACAATAATTTTGCACGTAAAACAG        |
| GCCGTCAATAGATAATAAAAAAATACAGTACCTTTTAC    |
| GTCAGATGAATATACAACATTTGAGGATTTAGAAG       |
| ATCCTTTGCCGAACGTTGATTTTCAGGTTTAAAC        |
| AAATAAAGAAATTGCGTATCAATATAATCCTGATTGT     |
| TCAGATGATGGCAATTCATTAATTTTAAAAGTTTGA      |
| GTAACATTATCATTTTGCAGTCCGCGTGCCCCCT        |
| GCATCAGACGATCCAGATTCGACAACCTCGTATTAA      |
| TATTAGACTTTACAAAACATGAGGAAGGTTATCTAAAA    |
| ATGAAAAATCTAAAGCATCACAAAACACTAATAGATTAGA  |
| TATCTTTAGGAGCACTAATTGCTGAACCTCAATATC      |
| AACAGTTGAAAGGAATCGCAGTGTCACTGCGCGCC       |
| CCGTTTTACGGTCATACGGTCAGTTGGCAAATC         |
| AAACCCTCAATCAATATCGGTGAGGCGGTCAGTATTA     |
| TAGCCCTAAAACATCGCCATTCACGCTGAGAGCCAGAGCAA |
| ACACCGCCTGCAACAGTGAAAATACCGAACGAACCCAC    |
| CAGCAGAAGATAAAAACAGAGAATACGTGGCACAGACA    |
| CATTGGCAGATTCACCAAAAGTCTTTAATGCGCGAACTGA  |
| ATATTTTTGAATGGCTATAGTCACACGACCAGTAATA     |
| TCTGACCTGAAAGCGTGGGGTTTTCTGCCAGCACG       |
| TGAGGATCCCCGGTACCACAGAGATAGAACCCT         |
| AAAGGGACATTCTGGCCAGCTCATGGAAATACCTACA     |

|                                        |
|----------------------------------------|
| TTGCCTGAGTAGAAGAAAAAATGAAATGGATTATTTA  |
| TTTTGACGCTCAATCGTCACTCAAATATCGGCCTTG   |
| TTGCAACAGGAAAAACGAGCTCGAATTCGTAATCA    |
| TCACAATTCACACAACAATATTACCGCCAGCCA      |
| CTGGTAATATCCAGAACAATCACGCAAATTAACCGTT  |
| AAGGGATTTTAGACAGAAAAAATTAGTAATAACATCAC |
| GTAGCAATACTTCTTTGAGAACGGTACGCCAGAATCC  |
| GTAAAAGAGTCTGTCCTACGAGCCGGAAGCATAAA    |
| ACATTAATTGCGTTGCGCTCAGTGAGGCCACCGA     |
| TGAGAAGTGTTTTATAATAACGTGCTTTCCTCGTTA   |
| GGTCACGCTGCGCGTAAAAAAAACAGGAGGCCGATTA  |
| GAATCAGAGCGGGAGCTAACACCACACCCGCCGCGC   |
| CTTTGACGAGCACGTATCACTGCCCGCTTCCAGT     |
| CCAACGCGCGGGGAGAGGGCGCGTACTATGGTTG     |
| TTAATGCGCCGCTACAGGAAGGAAGGGAAGAAAGCGA  |
| GAGGTGCCGTAAGCAAAAAACGCTGGCAAGTGTAGC   |
| AAGGAGCGGGCGCTAGGGCTAAATCGAACCCCTAAG   |
| GGCGAACGTGGCGAGACGGTTTGCATTTGGGCGC     |
| AGCTGATTGCCCTTACCCTTGACGGGGAAAGCC      |
| GGAGCCCCGATTAGAGAAAAAGAATAGCCCGAG      |
| ATAGGGTTGAGTGTGACAAGTTTTTTGGGGTC       |
| CTACGTGAACCATCACATTCCAGTTTGAACAAGAG    |
| GCACTCCAGCCAGCTTTCGACTCCAACGTCAA       |
| TCCACTATTAAGAACGTATGGTGGTTCCGAAATCGG   |
| CAAAATCCCTTATAAATCGCCTGGCCCTGAGAGAGTT  |
| GCGAAAATCCTGTTTGGCGCACCGCTTCTGGTGCC    |
| GCAACTGTTGGGAAGGGCTGTTTGCCTCCAGCAG     |
| GCAAGCAAGCGGTCCACGCAACGACGGCCAGTGCC    |
| AAGCTTTCAGAGGTGGCACCAGTGAGACGGGCAAC    |
| CAGGGTGGTTTTCTTTGGGATAGCTCACCGG        |
| AAAAAGAGACGCAGAAAGCTGCATTAATGAATCGG    |
| CGGGAACCTGTCGTGCCGTGATGAAGGGTAAAG      |
| TTAAACGATGCTGATTCTAATGAGTGAGCTAACTC    |
| GTGTAAGCCTGGGGTGTGCTGGTCTGGTCAGC       |
| AGCAACCGCAAGAATGGTGTGAAATTGTTATCCGC    |
| TGGTCATAGCTGTTTCTGCGCGTTGCGGTATG       |
| AGCCGGGTCAGTGTGCCGTGAGCCTCCTCACAGT     |
| CGTGCCTGTTCTTCGCGTGCGGCCAGAATGCGGCGGG  |
| TGTGCACTCTGTTGGTGTGTTAACGGCATCAGATGCC  |
| TGGTGTGTTAGCAAATCCCCTGCGGCTGGTAATGGG   |
| TAAAGGTTTCTTTGCTCGGGGGTCATTGCAGGGCCTT  |
| TCGCACTCAATCCGCCGGCCAACGGCAGCACCGTCGG  |
| TGGTGCCATCCACGCAATAACGGAACGTGCCGGACT   |
| TGTAGAACGTACGCGTGGGCGGTTCCGGCAAACGCGG  |
| TCCGTTTTTTCGTCTGTAATAATCCCCTAAAAAAG    |
| CCGCACAGGCGGCCTTTAACAGCGGATCAAATTTAAA  |
| TTTCTGCTATTTGCCGCCGGAATTTGTGAGAGATA    |
| GACTTTCTCCGTGGTAAAGCCGCCACGGGAACGGAT   |
| AACCTCACCGAAACAATGGGTAACGCCAGGGTTTTTC  |
| CCAGTCACGACGTTGTAAGATCGGTGCGGGCCTTTC   |

**Supplementary table 6.** Staple strand sequences for folding the ring flat sheet.

|                                                           |
|-----------------------------------------------------------|
| GGCGACATTCAACCGATTGAGGGAAGCAGTTGGGCGGTTG                  |
| ACCGACTTGAGCCATTTGGTTTACCAGCGCCAAAGACAAAAG                |
| CAATAGAAAATTCATATGATGATTAAGACTCCTTATTA                    |
| TGTACATCGACATAAAAAAGTTTATTTTGTCACAAT                      |
| ATAAAAGAAACGCAAAGACACCAGGAATCGGCCAGAGCACATCCTCA           |
| TGGTCAGCAGCAACCGCAAGAATGCCATAGAAAATACATACATAAAGGTGGCAACAT |
| CGCAGTATGTTAGCAAACGACGGCAGCACCGTCGGTGGTGCCAT              |
| TAATAACGGAATACCCAAAAGAAGTGGCAGAATTAGAGCCAGCAA             |
| CCCACGCAACCAGCTTACGGCTGGTTACCAGAAGGAAACCGAGGAAACGCAA      |
| AAGCAGATAGCCGAACAAAATGTCCAGCATCAGCGGGGTCATTG              |
| AATCACCAGTAGCACCAAAGCCCTTTTTAAGAAAAGT                     |
| ACAATGAAATAGCAATAGCTATCTTACCGTTTTCGGTCATAGCCC             |
| CAGGCGCTTTCGCACTCAATCCGTGAGTTAAGCCCAATAATAAGAGCAAGAA      |
| AGAGATAACCCACAAGAATACGCGGTTGCGGTATGAGCCGGGTC              |
| CCTTATTAGCGTTTTGCAAAATTGAGCGCTAATATCAG                    |
| AACTGAACACCCTGAACAAAAGTCAGAGGGCCACCACCAGAGCCGC            |
| ACTGTTGCCCTGCGGCTGGTAATAACAGGGAAGCGCATTAGACGGGAGAATT      |
| CAGAGAGAATAACATAAAAAAGGTTCTTTGCTCGTCATAAAC                |
| CGCCAGCATTGACAGGAAATGAAAATAGCAGCCTTTA                     |
| TAAGAAACGATTTTTGTTAACGTCAAATTTGATGATACAGGAG               |
| ATCCCTTACACTGGTGTGTTACAGAAACAGCCATATTTATCCCAATCCAAA       |
| TTTGCCAGTTACAAAATAACGTTAACGGCATCAGATGCCGGGT               |
| TGTAAGGTAATAAGTAAGCGTCTTTCCAGAGCCTAA                      |
| TTTTATCCTGAATCTTACCAACGTAACGGAAGGATTAGGATTAG              |
| TACCTGCGCCAGCGGTGCCGTTAGTTGCTATTTGCACCCAGCTACAA           |
| TTGAAGCCTTAAATCAAGCTGCATCAGACGATCCAGCGCAGT                |
| CGGGGTTTTGCTCAGTAACCCGACTTGCGGGAGGTT                      |
| TCTAAGAACCGGAGGCGTTTTAGCGAACCCCTCAGAGCCACCAC              |
| GTCACCTGCGCGCTGTGCACTCTAAAATCAGATATAGAAGGCTTATCCGGTAT     |
| CCGCGCCAATAGCAAGCAGCTGCGGCCAGAATGCGGCGGGCC                |
| CCTCATTTTCAGGGATAATTCATCGTAGGAATCATTAA                    |
| CTCATCGAGAACAAGCAAGCCGTTTTATCGTCTTTCCAGACGTT              |
| GTTTTACGGTTCATACCGGGGTACAAGAACGGGTATTAACCAAGTACCGCA       |
| TGCTTTCTTATCATTCCCAGCACGCGTGCCTGTTCTTCGC                  |
| AGTAAATGAATTTTCTAAAACCAATCAATAATCGGC                      |
| AATATCCATCCTAATTTACGAGCATGTAAGGAGCCTTTAATT                |
| GTCCGTGAGCCTCCTCACAGTTGAACAATAGATAAGTCCTGAACAAGAAAAAT     |
| GAACGCGCCTGTTTATCAACCCGGGTACCGAGCTCGAATTTCG               |
| GTATCGGTTTATCAGCAAAACATGTTACGCTAATGCA                     |
| AGTAATTCTGTCCAGACGACGACAATAAAGCCGCTTTTTCGGGAT             |
| TAATCATGGTCATAGCTGTTTCCAAGAGAATATAAAGTACCGACAAAAGGTAA     |
| ATTTTCGAGCCAGTAATAGAAAATTGTTATCCGCTCACAATTC               |
| CGTCACCCCTCAGCAGCAATGTAATTTAGGCAGAGGC                     |
| TTGAGAATCGCCATATTTAAACAACGCCAACCTAAAACGAAAGAGG            |
| CACACAACATACGAGCCGGAAGCATAAAGCCAACGCTCAACAGTAGGGCTTAA     |
| TACAAATCTTACCAGTAAGTGTAAAGCCTGGGGTGCCTAATG                |
| CAAAAGAATACTAAAATTTAGTATCATATGCGTTA                       |
| ACCGGAATCATAATTACTAGAAAAAGCCTAACGAGGCGCAGACGG             |
| AGTGAGCTAACTACATTAATTTGGATAAATAAGGCGTTAATAAGAATAAAC       |
| TTGAAAATACCGACCGTGTACGCTCACTGCCCGCTTTCCAGTCG              |
| TCAATCATAAGGGAACAACCTGACCTAAATTTAATGGT                    |
| TTTCAAATATATTTTAGTTAATTTTCTGTAACAAAGCTGCTCA               |
| GGAAACCTGTCGTGCCAGCTGCAAATCGCAAGACAAGAACGCGAGAAAACCTT     |
| AATGCTGATGCAAATCCAAGAATCGGCCAACGCGGGGAGAG                 |



|                                                         |
|---------------------------------------------------------|
| TTCAGTGAATAAGGCTAAGGTTATATACTATATGTA                    |
| GACTACCTTTTTAACCTCCGGCTTAGGTTGGACGTTGGGAAGAAA           |
| GCGGTTTGGCTATTGGGCGCCAGAGTGAATTTATCAAATCATAGGTCTGAGA    |
| CGCTGAGAAGAGTCAATAATTTTTCTTTCCACAGTGAGACGG              |
| AATCTACGTTAATAAAAAGCGATAGCTTAGATTAAGA                   |
| TAATTTCCCTTAGAATCCTTGAAAACATGCAACACTATCATAAC            |
| GCAACAGCTGATTGCCCTTACCACCTTGCTTCTGTAAATCGTCGCTATTAAT    |
| ATATATGTGAGTGAATAAAGCCCTGAGAGAGTTGCAGCAAGCG             |
| CCTCGTTTACCAGACGAAGGAAACAGTACATAAATCA                   |
| AACAATTTCAATTTGAATTACCTTTTTTAAAGATCCCCCTCAAATG          |
| GTCCACGCTGTTTGGCCAGCAAACATCAAGAAAACAAAATTAATTACATTT     |
| AAGAAGATGATGAAACAAAAATCCTGTTTGATGGTGGTTCCG              |
| CTTTAAACAGTTCAGAAAATTTCAATTACCTGAGCAA                   |
| GTTACAAAATCGCGCAGAGGCGAATTATTTAATTTCGAGCTTCAA           |
| AAATCGGCAAAATCCCTTATAAAAACGGATTTCGCTGATTGCTTTGAATACCAA  |
| CATCGGGAGAAACAATAAAGAATAGCCCAGATAGGGTTGAG               |
| AGCGAACCAGACCGGAAAACAGTAACAGTACCTTTTA                   |
| AGATTTTCAGGTTTAACTGTCAGATGAATATTTAAATATGCAACTA          |
| TGTTGTTCCAGTTTGGAAACAAGAACACGTAAAACAGAAAATAAGAAAATTGCGT |
| CCATATCAAATTTTACTATTAAAGAACGTGGACTCCAAC                 |
| AAGTACGGTGTCTGAAAATGGAAGGGTTAGAACCTA                    |
| TCCTGATTGTTGGATTATACTTCTGAATCGAGCTGAAAAGGTGG            |
| GTCAAAGGGCGAAAAACCGTCTAATATCAGATGATGGCAATTCATCAATATAA   |
| TATCATCATATTCCTGATAGCGATGGCCACTACGTGAACCAT              |
| CATCAATTCTACTAATAACCACCAGAAGGAGCGGAAT                   |
| GTAACATTATCATTTTGCAGAACAAAGAAAATACTTTTGCAGGAG           |
| CACCCAAATCAAGTTTTTGGGGACCCGAACGTTATTAATTTAAAAGTTTGA     |
| CTCGTATAAATCCTTTGAGTGCCGTAAAGCACTAAATCGGAA              |
| AAGCCTTATTTCAACAATTTACAACAATTCGACAA                     |
| AATACATTTGAGGATTTAGAAGTATTAGATTTCAACCGTTCTAG            |
| CCCTAAAGGGAGCCCCGATTTAACAATAATAGATTAGAGCCGTCAATAGAT     |
| TATCTTTAGGAGCACTAAATGACGGGAAAGCCGGCGAACGTG              |
| CTGATAAATTAATGCCAATGAGGAAGGTTATCTAAAA                   |
| TCAGTTGGCAAATCAACAGTTGAAAGGAACCGGTTGATAATCAGA           |
| GCGAGAAAAGGAAGGGAAGAAAGCACAATATCAAACCTCAATCAATATCTGG    |
| CATCACCTTGCTGAACCTAGAGCGGGCGCTAGGGCGCTGGCAA             |
| AAAGCCCCAAAAACAGAAGCAAATGAAAAATCTAAAG                   |
| CCTGCAACAGTGCCACGCTGAGAGCCAGCGCTGGCCTTCTG               |
| GTGTAGCGGTACGCTGCGGTACAGAGGTGAGGCGGTGAGTATTAACACCG      |
| CACCAGCAGAAGATAAAAACACCCGCCGCTTAATGCGCC                 |
| TAGCCAGCTTTCATCAAATTAATAATACCGAACGAAC                   |
| GCGCGAAGCTGATGCCCTAAAACATCGCCAGTTTGAGGGGACGAC           |
| GCTACAGGGCGCGTACTATGGTTAATTTTTGAATGGCTATTAGTCTTTAAT     |
| GAATACGTGGCACAGACAATGACGAGCACGTATAACGTGCTTT             |
| GACAGTATCGGCCTCAAATCTGACCTGAAAGCGTAA                    |
| GGGACATTCTGGCCAACAGAGATAGAACCCGCTATTACGCCAGT            |
| CCTCGTTAGAATCAGAGCGGGAGATTACCAGTACACAGACCAGTAATAAAA     |
| GATTATTTACATTGGCAGCAGGAGGCCGATTAAAGGGATTTT              |
| GGCGAAAAGGGGGATGTACGCTCAATCGTCTGAAATG                   |
| AAAACGCTCATGGAAATACCTACATTTTGAACAATCGGCGAAAC            |
| AGACAGGAACGGTACGCCAGAATAACAATATTACGCCAGCCATTGCAACAGGA   |
| TGCTGGTAATATCCAGAAAGAGAAGTGTTTTTATAATCAGTGAGGC          |
| GTACAGCGCCATGTTTAAAGAACTCAAATATCGGCCT                   |
| ATTAGTAATAACATCACTTGCTGAGTAGAAAACGCGGTCGGTTTTTTTCG      |
| TAACGGAACGTGCCGGACCGCAAATTAACCGTTGTAGCAATACTTCTTTG      |
| CACCGAGTAAAAGAGTCTGTCCATCAATTTAGAACGTACAGCGTGGTCTGGTC   |

|                                             |
|---------------------------------------------|
| TCTCGTCGCTGGCAGCCTAAAAATCCCGTAAAAAAGCCGCAC  |
| TGATTGCCGTTCCGGCCAGTCCCGAATTTGTGAGAGAT      |
| GACGCAGAAACAGCGGAATAAAGTTAAACGATGC          |
| AGGCGCCTTTAGTGATGAAGGGAACTTAAATTTT          |
| TGCTCATTTGCCGAAAGGAAGGTAATATTGA             |
| CCAGTGCCAAGCTTTCAACTCTCACGAAAAAGA           |
| AGACTTCTCCGTGGTGAAGGGAAGAGGTGGAGCCGCCACGG   |
| GAACGGATAACCTCACCGGCTGCAAGGCGATTAAGTTGGGTA  |
| ATTCGCCATTACAGGCTACGTTGTAACGACGG            |
| ACGCCAGGGTTTTCCAGTCACGGCGCACTGTTGGGAAGGG    |
| CGATCGGTGCGGGCCTCTGGAAGATCGCACTCCAGCCAGCTT  |
| TAATGGGATAGGTCACAAACCAGGCAAAGCGCC           |
| TCCGGCACCGCTTCTGGTGCCGGGTTGGTGTAGATGGGCGCA  |
| TCGTAACCGTGATCTGCACATTAATGTGAGCGAGTAACAA    |
| TTTTGTTAAATCAGCTAACGGCGGATTGACCG            |
| CCCCTCGGATTCTCCGTGGGAACCATTTTTAAACCAATAGGA  |
| ACGCCATCAAAAATAATTGAAGATTGTATAAGCAAATATTTA  |
| ACAAGAGAATCGATGAAAAAATTCGCATTAAT            |
| AATTGTAAACGTTAATATTTGTACGGTAATCGTAAACTAG    |
| CATGTCAATCATATGTACGGAGAGGGTAGCTATTTTTGAGAG  |
| AAAGATTCAAAAGGGTAGCCGAGTCTGGAGCAA           |
| ATCTACAAAGGCTATCAGGTCATGAGAAAGCCGGAGACAGT   |
| CAAATCACCATCAATATGGCAAGGATAAAAAATTTTAGAACCC |
| AAAGCCTCAGAGCATAATGAGTAATGTGTAGGT           |
| CTCATATTTTTAAATGCAATGCAAGCTAAATCGGTTGTACC   |
| AAAAACATTATGACCCTGAGTAGTAGCATTAAACATCCAATAA |
| GATACATTTGCAAATAAGCAAATTAAGCAAT             |
| ATCATACAGGCAAGGCAAAGAATGGTCAATAACCTGTTTAGC  |
| TATATTTTCATTTGGGGCAGTTTCATTCCATATAACAGTTGA  |
| TTTGCGGATGGCTTAGATTTAGTTTGACCATTA           |
| TTCCAATTCTGCGAACGAGTAGAGCTTAATTGCTGAATATA   |
| ATGCTGTAGCTCAACATGAGCAAACCTCAACAGGTCAGGATT  |
| CGGATTGCATCAAAAAATTGATAAGAGGTCATT           |
| AGAGAGTACCTTTAATTGCTCCTGATTAAGAGGAAGCCCGAA  |
| AGACTTCAAATATCGCGTAAACGAGAATGACCATAAATCAA   |
| AAATGTTTAGACTGGAAATAGTCAGAAGCAAAG           |
| AATCAGGTCITTACCCTGACTATTAGCGTCCAATACTGCGGA  |
| ATCGTCATAAATATTCATACGATAAAAACCAAATAGCGAGA   |
| CATTCAACTAATGCAGAAGAGGGGGTAATAGTA           |
| GGCTTTTGAAAAGAAGTTTTGCATACATAACGCCAAAAGGA   |
| ATTACGAGGCATAGTAAGACGAACTAACGGAACAACATTATT  |
| AATCATTGTGAATTACAAGATTTAGGAATACCA           |
| ACAGGTAGAAAGATTCATCAGTTCTTATGCGATTTTAAGAAC  |
| TGGCTCATTATACCAGTCTGCCCTGACGAGAAACACCAGAAC  |
| ACCTTCATCAAGAGTAAGTTAATTTCACTTT             |
| GAGTAGTAAATTGGGCTTGAGATATCTTGACAAGAACCGGAT  |
| ATTCATTACCAAATCAACGAACTGACCAACTTTGAAAGAGG   |
| CATCGCCTGATAAATTAGCGCATAGGCTGGCTG           |
| ACAGATGAACGGGTACAGACCAAGTGTGAAATCCGCGACCT   |
| GCTCCATGTTACTTAGCCAACACTCATCTTTGACCCCGAGCGA |
| TGAGGAAGTTTCCATTACAACGGAGATTTGTAT           |
| TTATACCAAGCGGAAACAAAGTAAACGGGTAATAACGTAA    |
| TGCCACTACGAAGGCACCAAAGACAGCATCGGAACGAGGGTA  |
| ATCGCCACGCATAACAATAAAGACTTTTTCA             |
| GCAACGGCTACAGAGGCTTTGAGCGATATATTCGGTCTGTA   |
| GGCTTGACAGGAGTTAAATGCTTTGAGGTGAATTTCTTAAA   |

|                                             |
|---------------------------------------------|
| AGGAATTGCGAATAATAGACAATGACAACAACC           |
| CAGCTTGATACCGATAGTTGCGCAATTTTTTCACGTTGAAAA  |
| TCTCCAAAAAAGGCTCATATGGGATTTTGCTAAACAACCTT   |
| CTGTAGCATTCCACAGAAGAAAGGAACAATAA            |
| CAACAGTTTCAGCGGAGTGAGAAACAGCCCTCATAGTTAGCG  |
| TAACGATCTAAAGTTTTGAGCAAGCCCAATAGGAACCCATGTA |
| TACTCAGGAGGTTTAGAGTACAAACTACAACGC           |
| CCGTAACTGAGTTTCGTACCTACCGCCACCCTCAGAACC     |
| GCCACCCTCAGAACC GCCACCAGGCGGATAAGTGCCGTCGAG |
| CGGAACCTATTATTCTAAATAGGTGTATCACCG           |
| AGGGTTGATATAAGTATAGCCCGAAACATGAAAGTATTAAG   |
| AGGCTGAGACTCCTCAAGTTAACGGGGTCAGTGCCTTGAGT   |
| GAATGGAAAGCGCAGTATGCCCCCTGCCTATTT           |
| AACAGTGCCCGTATAAACAGTTACTCTGAATTTACCGTTCCA  |
| GTAAGCGTCATACATGGCAGTTGAGGCAGGTCAGACGATTG   |
| CCACCCTCAGAACC GCAATCCTCATTAAAGCCA          |
| GCCTTGATATTCACAAACAAATACACCCTCAGAGCCACCACC  |
| CTCAGAGCCGCCACCAGACATCTTTTCATAATCAAATCACC   |
| GCGACAGAATCAAGTTAGCCTCCCTCAGAGCCG           |
| GGAACCAGAGCCACCACC GAACTGCCTTTAGCGTCAGACTG  |
| TAGCGCGTTTTTCATCGGCATTACCATTAGCAAGGCCGGAAC  |
| CGGAAATTATTATTAAAGCACCGTAATCAGTA            |
| GTCACCAATGAAACCATCGATAGAAGGTGAATTATCACCGTC  |

**Supplementary table 7.** Staple strand sequences for folding the three-hole disc flat sheet.

|                                                 |
|-------------------------------------------------|
| AACATTATGACCCTGTAATACTTAGGCAAGGCAAAGAATTAGCAAAA |
| ATTTTAAATGCAATGCCTGAGTATAAAGCTAAATCGGTTGTACCAA  |
| TTAAGCAATAAAGCCTCAGAGCAAAAAGATCTACAAAGGCTATCA   |
| ATTAACATCCAATAAATCATAATTGCGGGAGAAGCCTT          |
| CATATAACAGTTGATTCCAAAAAATTCTACTAATAGTAGTAGC     |
| GCGCGAGCTGAAAAGGTGGCATCTCTGCGAACGAGT            |
| TATTTCAACGCAAGGAATGTTTAGCTATATTTTCATTTGGG       |
| CAAATGGTCAATAACCCAGCGATTATACC                   |
| CCTGATAAATTGTGTCGAAATCCATTAGATACATTTTCG         |
| AGATTTAGTTTGAGAATATAATGCTGTAGCTCAACAT           |
| TCCAACAGGTCAGGATAAAACGGTGTCTGGAAGTTTCATTC       |
| GTTTTAAATATGCAACTAAAGTATAGAGAGTACCTTTAATTG      |
| TTAGAGCTTAATTGCTCGACCTGCTCCATGTTACT             |
| CTGACCAACTTTGAAAGAGGACACATTTTTGCGGATGGC         |
| CTCCTTTTGATAAGAGGTCCGAAAGACTTCAAATATCGCGTT      |
| TGACCATAAATCAAAAAAACAGACCGGAAGCAAAC             |
| TTAATTCGAGCTTCAAAGCGAACATCAGGTCTTTACCTGAC       |
| AAGATTAAGAGGAAGCAAAATGAACGGTGTACAGACCAGGCCG     |
| ATAGTAAGAGCAACTATCAAGCGGATTGCATCAA              |
| TATTATAGTCAGAAGCAAGGAATCGTCATAAATATTCATTGA      |
| CTAACGAGCGTCTAAAAAGTTCAGAAAAACGAGAA             |
| ATCCCCCTCAAATGCTTTAAACAAAGAGGGGTAATAGTAAAATGTTT |
| AGACTGGATAGCGTCCAATACTGTAACCCTCGTTTA            |
| TTTTGCAAAGAAGTTTTGCCTTCCAGAGCCTAA               |
| TTATCCAATCCAATAAAAAACCAAATAGCGAGAGGC            |
| CCAGACGACGATAAATTTAGGAATACCACATTC               |
| CACCAGAACGAGTAGTAAAACGCCAAAAGGAATTACGAGGC       |
| AACTAATGCAGATACATAACGTTAATAAAACG                |
| AGATTCATCAGTTGAGAAAACGATTTTT                    |
| CAAAGTTACCAGAAGGATTATTACAGGTAGAA                |
| AACTAACGGAACAAGGCAACATATAAAAGA                  |
| GTTGGGAAGAAAAATCTAAATTGGGCTTGAGATGGTTTA         |
| AACGCAAAGACACCACATCATTATACCAGTCAGGAC            |
| GATTTTAAGAACTGGCACGGAAATTATTCATT                |
| AGTAACAGTGCCCGTAGTGAATTACCTTATGC                |
| ATTTCAACTTTAATCATTAGGCTTGCCCTGACGAGAAA          |
| GCTGCTCATTCAAGTGAATAAACAGTTAATGCCCCCT           |
| ATTAAGAGGCTGAGACTCAAATCAACGTAACAAA              |
| CCGGATATTCATTACCTTTCCAGACGTTAGTAAAT             |
| TCAGCGGAGTGAGAATAGAAAGGGTAATCTTGACAAGAA         |
| ATAGGCTGGCTGACCTTCATCAAACGGTCAATCATAAGGGAACCGAA |
| TAGCCGGAACGAGGCGCAAACAATAAAGGAATT               |
| GCGAATAATAATTTTTGTACAACGGAGATTTGTATCATCG        |
| AAGCGGAAACAAAAGCCACTACGAAGG                     |
| TAAAACACTCATCTTTGACCATAAAAAATTTTAGAACCTCATAT    |
| AAAGGGTGAGAAAGCCGGAAGAGGCAAAGAATACAC            |
| CACCAACCTAAAAAAGCTACAGAGGCTT                    |
| TTAAACGGGTAATAACGTAAACGTTGAAAATCT               |
| AATTGTATCGGTTTTTTTCATGAGGAAGTTTCCA              |
| TGAGGACTAAAGAAAGTTAAGGCCGCT                     |
| CATCGGAACGAGGGTAGCAACAAGACAGTCAAATCACCATCAA     |
| ATTCGCGTCTGGCCTTCTGTAACCCTCAGCAGCGAAAGACAG      |
| TTTCCGGGATCGTATAACCGTGCATCTGCC                  |
| TTCGGTCGCTGAGGCTTGCAAGGATCAGCTTGCTTCGAGGTG      |

|                                                    |
|----------------------------------------------------|
| AGTTTGAGGGGACGACACATCGCCACGCATAACCGATATA           |
| CGACAATGACAACAACTCGGTGCGGGCCTCTTCGC                |
| AAGTTGGGTAACGCCAGGGTTTTATACCGATAGTTGCGC            |
| AATTTCTTAAACAGCTTGAATAGCAAGCCCAATAGGAACCC          |
| ATGTACCGTAACACTGAGTTTTAAAAGGAGCCTTT                |
| CCAAAAAAAAGGCTTTGCTAAACAACCTTCAACAGTT              |
| GAATTTTCTGTATGGGATGTCACCCAGTACAAACTACA             |
| AACGATCTAAAGTTTTGTCGTATCAAGAGAAGGATTAGGATTA        |
| GCGGGGTTTTGCTCAGTACCAAAGACAGCCCTCATAGTTAGCGT       |
| ACGCCTGTAGCATTCCACACCGCCACCCTCAGAGCCA              |
| CCACCCTATTTTCAGGGAAAACAGTCACGACGTTGTAAAACGAC       |
| ACCGCCACCCTCAAGGCGGATAAGTGCCGTCGA                  |
| ATAAATCCTCATTAAAAAACGCCACCCTCAGA                   |
| CGTACTCAGGAGTTTTAGTACCCAGAATGAAAGCGCAGT            |
| ATGGCTTTTGATGAGCCCGGAATAGGTGTATCAC                 |
| GAGGGTTGATATAAGTATTATTCTGAAACATGAAAAGT             |
| GCCTATTTTCGGAACCTATACAGGAGTGTACT                   |
| AAAGGTGAATTATCACCGGGGTCAAGTGCCTTG                  |
| GGTAATAAGTTTTTCGTAATCAGTAGCGAC                     |
| AGAATCAAGTTTGCCTAGTAAGCGTCATAC                     |
| CTCTGAATTTACCGTTCCATTGACAGGAGTTGAGGC               |
| TCAGAACCGCCACAAAATGATATTCACAAAACAA                 |
| AGGTCAGACGATTGGCCTACCTCAGAGCCACC                   |
| CAGAGCCGCCGCCAGCATAGCGTCAGACTG                     |
| CCCCCTTATTAGCGTTTGCCACCAGAACCACCAC                 |
| ACCCTCAGAGCCGAGAGCCGCCACCC                         |
| CACCGGAACCGCCCATCTTTTCATA                          |
| CAATTTCAATTTGAATTAGAACAGAGCCAC                     |
| ATCAAAATCACCGTTAGATTAAGACGCTG                      |
| AGAAGAGTCAATAGTGTCCGGCATTTTCGGTCATAG               |
| TAGCGCGTTTTCAAACACCAATGAAACC                       |
| ATCGATAGCAGCAATCACCGACTTGAGCCATTT                  |
| CATTAGCAAGGCCGAAACGTAATTTATCAAAATCATAGG            |
| AGGTTGGGTTATAAATCACCAGTAGCACCATTAC                 |
| GGGAATTAGAGCCAGCAAGATTGAGGGAGGG                    |
| AAGGTAAATATTGAGAATAAGTTTTTTTTGTCA                  |
| ACAAAAGGGGACATTCAACCAAAAAACTATATGTAAA              |
| CCAAGTACCGCACTCATCAATATGGTTTACCAGCGCCAAG           |
| CAATCAATAGAAAATTCAAAACGTAGAAAAT                    |
| ACATACATAAAGGAAACCGAGGAAACGCAATA                   |
| CTTATTACGCAGTATGTTAGCAAGAACAAGCAAGCCGTTTT          |
| AATAGCAAGCAAAGAACTGGCATGATTAAGACTC                 |
| ATAACGGAATACCCAAAATCTTACCGAAGCC                    |
| TGTTTAAACGTATAAGCAGATAGCCGAA                       |
| CTTTTTAAGAAAAAGCTAATATCAGAGAGATAA                  |
| ACAATGAAATAGCAATAGCTATCAGATATAGAAGGCTTATCCGGT      |
| CGACTTGCGGAGCCCAATAATAAGAGCAAGAA                   |
| CCCACAAGAATTGAGTTATTTTGAAGCCTTA                    |
| AGTCAGAGGGTAATTGAGAAAAATGAAAATAGCAGCC              |
| AATCAAGATTAGTAAACTGAACACCCTGAACAA                  |
| ATTAGACGGGAGAATTTGCTATTTTGCACCCA                   |
| GCTACAATTTTATCCTAAAAACAGGGGAAGCGC                  |
| TTTACAGAGAGAATAACAAAATAAACAGCCATATTAT              |
| TTTGCCAGTTACAAATCTTACCAACG                         |
| GAGAATATAAAGTACCAAAAAGCGAACCTCC                    |
| ATTCTAAGAACGCGAGGGCGTTTTGACAAAAGGTAAGTAATTCTGTCCAG |

|                                                          |
|----------------------------------------------------------|
| ACGACGACAATAAACAACATGTTTCAGCATTACCGCGCCC                 |
| TATTTTCATCGTAGGAATATCCAAGAACGGGTATTTAA                   |
| TGTCTTTCCTTATACTAATGCAGAACGCGCCTG                        |
| TGACCTAAATTTAATGGTTTGAAAAATCAATAATCGGC                   |
| CCTAATTTACGAGCATGTAGAAACCAACGCTCAACAGTAGGGCTT            |
| GTAATTTAGGCAGAGGTCCTGAACAAGAAAAATAATATCCCAT              |
| TTTATCAACAATAGATAAATTCGAGCCAGTAATAA                      |
| GATAGGGTTGAGTGTGTTCCAAATTAACAACGCCAACAT                  |
| AATTGAGAATCGCCATATAGTTTGGAACAAGAGTCCACTATTTAA            |
| CTTACCAGTATAAAGCCAATACCGACCGTGTGATAAATAAGGC              |
| GAACGTGGACTCCAACGTCAAAGGGCCATATGCGTTATACAAATT            |
| AAAGCCTGTTTAGTATCAGGAGGCCGATTAAGGGGATTTT                 |
| TCAGTGAGGCCACCGAGTATCATAATTACTAGAA                       |
| GTTAAATAAGAATAAACACCGGAATATATTTTAGTTAATTTTCATCTTC        |
| ACGCGAGAAAACTTTTAAGAGTCTGTCCATCACGCAA                    |
| GCTTCTGTAATCGTCAAATCGCAAGACAAAGA                         |
| TGCTGATGCAAATATAACCTCCGGCTT                              |
| TCTGAGAGACTACCTTTTGTATTAATTAATTTTCCCTTAGA                |
| ATCCTTGAAAAATAGCGATAGCACCTTTTAAATGGAAACA                 |
| ATTAACCGTTGTAGCAATACTAGTGAGTGAATAACCTT                   |
| GTACATAAATCAATATATAATTACCTGAGCAAAGAAGATGA                |
| TATACTTCTGAATAATGGAAGGGAAAAATTAATTACATTTAA               |
| TGAAACAACATCAAGAAAAACAATAACGGATTCGCTGA                   |
| GCGAATTATTCATTTCAACTTTGATTAGTAA                          |
| GGCCTTGCTGGTAATATCCAGAAACAAATCGCGCAGAG                   |
| TTGCTTTGAATACCAAGTAGATTACCCAGTCACACGACCA                 |
| CTTTTACATCGGGAGAAATAGAACCTACCATATCAAAATTAT               |
| GTAATAAAAGGGACATTCTGGAGAATATACAGTAACAGTAC                |
| CAGGTTTAACGTCAGATCGCCATTAATAACCGAACGAA                   |
| ACACCGCTGCAACAGTGAAATTCGCTAGATTTT                        |
| TTGCACGTAAAACAGAAATAAAGAACAATATAATCCTGATTGTTTGGAT        |
| TATCAGATGATGGCAATTAACCACGCTGAGAGCCAGCAGCAAAT             |
| CCCTCAATCAATATCTGGAATTATCATATTCCTGAT                     |
| ACCAGAAGGAGCGTCAGTTGGCAAATCAACAGTTGAA                    |
| TAATAGATTAGAGCCGTCAATAGAGAACAAGAAACC                     |
| CATTATCATTAAATAACATTTGAGGATTTAGAAG                       |
| GCGCCATGTTTACAAAAATGCCAACGGCAGCACCGTCGGAAAAAAGTTTGAAGTAA |
| GCCCGAACGTTATTAATTTAAGCCCTGCGGCTGGTAATGG                 |
| ACACTGGTGTGTTCAGAACAACCTGATTTAAATCCTTT                   |
| TATTAGACTTTACAAACAATTCGAAATCGTTAACGG                     |
| CATCAGATGCCGAATATCTTTAGGAGCACTAACAAC                     |
| AGGAATTGAGGAAGTTATCTAAATTACCTGCAGCCAGCGGTG               |
| CCGGTGCCCCCTGCATCAACTGAACCTCAAATATCAAA                   |
| GAAAAATCTAAAGCATCACCTTGACGATCCAGCGCAGTGTCA               |
| CTGCGCGCCTGTGCACTCAGGTGAGGCGGTGAGTATTA                   |
| CCACCAGCAGAAGATAAAACAGAAGGTGCTGCGGCCAGAATGC              |
| TAGCCCTAAAACAAAACAGAGATAGAACCCTTC                        |
| GGCGGGCCGTTTTACGGAATGCGCGAECTGA                          |
| TTGAATGGCTATTAGTCTTTATACGGGGGTTTCTGCCAGCACGC             |
| GCCGGAAGCATAAAGTATACGTGGCACAGACAATATTT                   |
| TGACCTGAAAGCGTAAGAATCTGAAATGGATT                         |
| ATTTACATTGGCAAACAATATTACCGCC                             |
| CTACATTTTACGCTCAATCGAGTAAAGCCTGGGGTGCCTAATGAG            |
| TCCAGTCGGGAAACCTGTAAAAACGCTCATGGAAATAC                   |
| AGCCATTGCAACAAGCGCTTAATGCGCCGC                           |
| TACAGGGCGCGTACTAAGTGAAGAACTCAAATATC                      |

|                                                 |
|-------------------------------------------------|
| TAACATCACTTGACTGAGAAGTGTTCCTTATAA               |
| AGACAGGAACGGTACGCCAGAATGGTTGCTTTGACG            |
| TCAGAGCGGGAGCTAAAGAAAAACCGTCTA                  |
| CAAGTTTTTTGGGGTCGAGGTGCGCTTTCCTCGTTAGAA         |
| AGCACGTATAACGCGCTGGCAAGTGTAGCGGTCACGC           |
| TGCGCGTAACCACACACCCGCCGTGCCAGCTGATTAATGAAT      |
| AGCGAAAGGAGCGGGCGCTAGGGCGTAAAGCACTAA            |
| CGGCCAACGCGGGGAGAGGCGTGGCGAGAAAGGAAGGGAAGAA     |
| TTGACGGGAAAGCCGGCGAAAGGCCCTGAGAGAGTTGACGCA      |
| AGCGGTCCACGCTGGTTTGCCAAGGGAGCCCCGATTTAGAGC      |
| ATCGGAACCCTAACAGGCGAAAATCCTGTTTGATGGT           |
| GGTTCGAAATCGGCAAATCCCCTACTCGTGAACCATCACCCAAAT   |
| TCAGGGCGATGGCAATAAATCAAAGAATAGCCCGA             |
| AGCTGATTGCCCTTACCCGGTTTGCGTATTGGGCGC            |
| GGGTACCGAGCTCGAATTCGTA AAAACACCACTGAGACGGGCAAC  |
| CAGGGTGGTTTTCTTTTTGCGCTCACTGCCCGCTT             |
| TGAGCTAACTCACATTAATTGCGTCATGGTCATAGCTGTTTCTGTG  |
| GTGCCTGTTCTTCGCGTCCGTGAATCCACACAACATACGA        |
| TGAAATTGTTATCCGCTACAATGCCTCCTCACAGTTGAGGATCCCC  |
| GCGCTTTCGCACTCAAGTCATAAACATCCCTT                |
| GTAAAGGTTTTCTTTGCTCCGCGGGCGGTTGCGGT             |
| ATGAGCCGGGTCCTGTTATGGTGCCATCCACGCAACCAGCT       |
| GTGCCGGACTAAAAGCGGGGTCATTGCAG                   |
| TACGGCTGGAGGTGCCAGCATCGTAGAACGTCAGCGTGGTGTGGT   |
| CTGGTCAGCAGCAACCGCAAGAAACAGTCCCGGAATTTGTGAGAG   |
| ATAGACTTTCTCCGTGGTGAACATAACGGAAC                |
| CCTCCGGCCAGAGCACATAGGGATAGCTCTCACGGA AAAAGAG    |
| CGCCAGCAGTTGGGCGGTTTCGTCTCGTGGCAG               |
| GCAAACGCGGTCCGTTAATGTGTACATCGACATAAAAAAATC      |
| GCTTCTGGTGCCGAAACAGAAAGCTGATTGCCGTTCCG          |
| GGTAAAGTTAAACGATGCAAAGCGCCATTCGCCATTCAGG        |
| TATTACGCCAGCTGGCGAGCCTTTAGTGATGAAG              |
| CCGTAAAAAAGCCGCACAGGCGAAGAGCCGCCACGGGAACGGA     |
| TAACCTCACCGGAAACAATAAATTTCTGCTCATTTGC           |
| ACGCAGAAACAGCGGATCAAACCTGGCGAAACGTACA           |
| GGCCAGTGCCAAGCTTTCAGAGGAAGGGGATGTGCTGCAAGGCGATT |
| CTGCGCAACTGTTGGGAAGGGCGACAGTATCGGCCT            |
| ATTCTCCGTGGGAACAAACGAAATCCAGCCAGCTTCCGGCACC     |
| CAGGAAGATCGCAGGATTGACCGTAATGGGATAGGTC           |
| ACGTTGGTGTAGATGGGCGCATCAGCCAGCTTTCAT            |
| TAAATTGTAACGTTAATATTTTAAAAGAGCGAGTAACAACCCGTCGG |
| CAACATTAAATGTTTAAAAATTCGATTAAATTTTTGT           |
| TATGATATTCAACCGTTCTAGATAGGAACGCCATCAAAAATA      |
| TAAATCAGCTCATTTTTAACCAAGGAAGATTGTATAAGCAAATATT  |
| GGTCATTGCCGCCCAAATGATAAATTAATGCCGGAG            |
| AGGGTAGCTATTTTTGAGATGTGTAGGTAAGATTCA            |

**Supplementary table 8.** Staple strand sequences for folding the hand flat sheet.

|                                                                       |
|-----------------------------------------------------------------------|
| GGACGACGACAGTATCGGCCTCAGGAAGAGACAATGACAACAACCATCGC                    |
| TGCGCAACTGTTGGGAAGCATCGTAACCGTGATCTGCCAGTTTGAGG                       |
| GGTCACGTTGGTGTAGATGGGCGTCTGTAGCCAGCTTTCAT                             |
| CCACGCATAACCGATATTCACGGCGGATTGACCGTAATGGGATA                          |
| TTCTCCGTGGGAACAAAGGCACCAACCTAAAACGAAAG                                |
| CAAAAACATTATGACCCTGTAATACTGTAACAACCCGTCGGA                            |
| CAACATTAATGTGAGCGAGAGACAGTCAAATCACCATCA                               |
| ATAATTCGCGTCTGGCCTCGCATTAAATTTTTGTAA                                  |
| ATATGATATTC AACCGTTCTAAATAGGAACGCCATCAAAA                             |
| ATCAGCTCATTTTTAACCGTAAACTAGCATGTCAATCATA                              |
| ATTTAAATTGTAAACGTTAATTTTTGTTAAATGCGATCGGTGCGGGCCTCT                   |
| AACGCCAGGGTTTTCCAGTCACGACGTTGTAACGAAAGCCCCAAAAACAGGAAGATTGTATAAGCAAAT |
| TGTACCCCGGTTGATAATCAGAAAGGCCAGTGCCAAGCTTGGGCACGA                      |
| CGATGAACGGTAAACTGATAAATTAATGCCGGA                                     |
| ATATAGGGCCTTGAATCGGCTGCAACAAGAGAAT                                    |
| GTCATTGCCTGAGAGTCTGGAATTTTACATAAATCATTTT                              |
| TAAATATGCAACTAAAGTACGGAGATCTACAAAGGCTATCAG                            |
| GAGGGTAGCTATTTTTGAATGTGTAGGTAAGATTCA                                  |
| AAAGGGTGAGAAAGGCCGTTTGCGGGAGAAGCCTTTA                                 |
| TTTAAATGCAATGCCTGAGTAAGTGTCTGGAAGTTTCATTC                             |
| AGTAGATTTAGTTATTTTTAGAACCCTCATATAT                                    |
| TTTCAACGCAAGGATAAACAAGGCAAAGAATTAGCAA                                 |
| AGGCAAAAGAATACACTAAAAACAGAGCATAAAGCTAAATCGGTTGTAC                     |
| AATTAAGCAATAAAGCCTATAAGGGAACCGAACTG                                   |
| TAGCATTAACATCCAATAAATCATAACAGGGACCATTAGATACATTTTCG                    |
| ACCAACTTTGAAAGAGAAAGGTGGCATCAATTCTACTAATAGTAG                         |
| TTGGGGCGCGAGCTGAAAATAAGGCTTGCCCTG                                     |
| AAATAGCGAGAGGCTTTTGCAAAAGATTAGCTATATTTTCAT                            |
| CAAATGGTCAATAACCTGATCAAAAATCAGGTCTTTACCC                              |
| TGACTATTATAGTCAGAAGCAAAATTCTGCGAACG                                   |
| CATATAACAGTTGATTCCTGCTCCTTTTGATAAGAGGTCATTTTTGC                       |
| TCCGAACCTGACCTCCTAATGCTGTAGCTCAACATGTTT                               |
| GGATGGCTTAGAGCTTAATTGCTGAATATAGGTGTAATGAGTAAACAGG                     |
| CAGGATTAGAGAGTACCTTTAATAAAGCGGATTGCATC                                |
| GCTTAAGCTACGTGGTGCGACCGGAAGCAAACCTCCAACAGGT                           |
| TTTTAATTCGAGCTTCAAAGCGAACCAATTACCTCGATAAAGACGGA                       |
| GATTGCGCTGATTGCTTTGAAGAAGCCCCGAAAGACTTCAAATATCGCG                     |
| AAAAAGATTAAGAAATGCTTTAAACAGTTCAGA                                     |
| AAACGAGAATGACCATAAAGTTTTGCCAGAGGGGGTA                                 |
| CATAAATATTCATTGAATCCCCTCAACCAAGTTACAAAATCGCG                          |
| AAGATGATGAAACAACAGGATAGCGTCCAATACTGCGGAATCGT                          |
| ATAGTAAAATGTTTAGACAATAGTAAGAGCAA                                      |
| ACGAGAAAACACCAAGATCGTTTACCAGACGACGATAAAAACCA                          |
| CACTATCATAACCAAACGTTAATAAAAACGAACTAACGGAA                             |
| ATGCAGATACATAACGCCAAAAGGAATTACGAGGAACAAGAAAACAAAATTAATTACATT          |
| AAATCAATATATGTGAGTAAATCAGTTGAGATTTAGGAATACCACATTCAACTA                |
| CAACATTATTACAGGTAGAAAGATCGGCATTTTCGGTCATAGCCCCCTTA                    |
| CAGGACGTTGGGAAGAAAAATCTCGAGTAGTAAATTGGGCTT                            |
| TTAGCGTTTGCCATTTTTCATAAATCATAAGAAGTGGCTCATTATACCAGT                   |
| TTACCTTATGCGATTTAGAACCGCCACCCTCA                                      |
| GAGCCACCACCCTCAGACTTTAATCATTGTGAA                                     |
| GAGATGGTTTAAATTTCAAATTAACCAATCAACGTAA                                 |
| CAAAGCTGCTCATTAGTAACAGATGAACGGTGTACAGACCAG                            |
| CAAGAACCGGATATTCACCGCCACCAGAACCAC                                     |



|                                                                      |
|----------------------------------------------------------------------|
| CACCAGAGCCGCCCATCAAGAGTAATCTTGA                                      |
| GCGCATAGGCTGGCTGACCTTCAAGACCTGCTCCATGTTACTTAGCCG                     |
| GAACGAGGCGCAGACGGTCAATCACTCATCTTTGACCCCCAGCGATTATACC                 |
| AATTGTGTCGAAATCAAAGCATTGACAGGA                                       |
| AAACAAATAAATCCTCATTAAAGGTATCATCGCCTGATA                              |
| AAGCGCGAAACAAAGTACAACGGAGATTTTTGAGGACTAAAGACTTTTTCATGAGGAAGTTTC      |
| CATTAAACGGGTAAAATACGTAATGCCACTACGAGTCGCTGAGGCTTGACGGGAGTTAAAGGCCGCTT |
| CAACGGCTACAGAGGCACCAGAATGGAAAGCGCAGTCTCTGAAT                         |
| CCAAAAAAGGCTCCAAAAGGAGCCTTTATCGGAACGAGGGTAG                          |
| TTGCGGGATCGTACCCTCAGCAGCGAAAGACAGTATCGGTTTATCAGCTTGCTTTGAGGGTGAAT    |
| TTCTTAAACAGCTTGATACCGATAGTTGCGCAAAAACGCACTCCAGCCAGCTTTCCGGCACCG      |
| TTACCGTTCAGTAAGCGTCATACATGAATAATAATTTTTTACGTTGAAAATCT                |
| AAGGAACAACTAAAGGAAGGCTTTTGATGATACAGGAGTGTACTGGT                      |
| GCCTATTTTCGGAACCTATTATTCTGAAACATGAATCAGCGGAGTGAGAATAGA               |
| TTGCTAAACAACCTTCAACAGAGTATTAAGAGGCTGAGACTCCTCAAG                     |
| CACCCTCATTTTCAGGGATAGATGAATTTTCTGTATGGGATT                           |
| TCTAAAGTTTTGTCGCTTTCCAGACGTTAGTAAAAAGCCCAATAGGAACCCATGTACCGTAACACTGA |
| AGAAGGATTAGGATTAGCGGGTTTTATTCCACAGACAGCCCTCATAGTTAGCGTAACGA          |
| GTTTCGTACCAGTACAACTACAACGCCTGTAGAGGTTTAGTACCGCCACCC                  |
| TCGAAACCGCCACCCTCAAACCGCCACCCTCAGAGCCAC                              |
| TAGGTGTATCACCGTACTAGCTCAGTACCAGGCGGATA                               |
| GGTTGAGGCAGGTAATAATAAGTATAGCCCGGAA                                   |
| AGTGCCGTCGAGAGGGTTGTAAACAGTGCCCGTATAAACAGTTAATGCCCCCT                |
| AATAAGTTTTAACGGGTCAGTGCCTTGAACAGACGATTGGCCTTGATATTCAC                |
| TCAGAGCCGCCACAAAATCACCGGAA                                           |
| GAAGGTAAATATTGACGGAAAAAAGGAACCGCCTCCC                                |
| CCAGAGCCACCACGTAATCAGTAGCGACAGAATCAAGTTTGC                           |
| CTTTAGCGTCAGACTGTAGCGGTTTTTACCTAATTTGCCAGTTA                         |
| ATGAAACCATCGATAGCAGCACCAAATTATTCTATAAAGGTG                           |
| CAAAATAAACAGCCATTTAGCAAGGCCGGAACGTCACCA                              |
| CAAAATCACCAGTAGCACCATTACCAATTTTATCCCAATCCAAATAA                      |
| ACAGAGAGAATAACATAAAAAACCTTGAGCCATTTGGGAATTAGAGCCAG                   |
| AATTATCACCGTCACCGATTCAACCGATTGAGGGAGG                                |
| GCCAAAGACAAAAGGGCGACAGGGAAGCGCATTAGACGGGAG                           |
| AATTAAGTGAACACCCTGAACAAATTCATATGGTTTTACCAGC                          |
| TTTTTTTTGTCACAATCAATACATACATAAAGGTGGC                                |
| CCGAACAAAGTTACCAGAAGGAAAAAGACACCACGGAATAAG                           |
| AACATATAAAGAAACGCAAAACCGAGGAAACGCAATAATAAC                           |
| AGTATGTTAGCAAACGTAGAAAAAGTCAGAGGGTAATTGAGCGCT                        |
| TAAGAGCAAGAAACAATGAAAGATTAAGACTCCTTATTACGC                           |
| GGAATACCCAAAAGAACTGGCATGCAATAGCTATCT                                 |
| TACCGAAGCCCTTTAAGAAAAGTAAGCAGATAG                                    |
| GAAACGATTTTTGTTAACGAAGAATTGAGTTAAGCCCAATAA                           |
| AATATCAGAGAGATAACCCACAATCAAAAATGAAAATAGCAGCCTTT                      |
| GAGCGTCTTTCCAGAGAAATAACCTTGCTTCTG                                    |
| TAAATCGTCGCTATTATCTTACCAACGCTAAC                                     |
| TGCACCAGCTACAATTTTATAATGCTGATGCAAATCCAATCG                           |
| CAAGACAAAGAACGCGAGAAAAAATCAAGATTAGTTGCTATTT                          |
| CGACTTGCGGGAGTTTTTGAATATACAAATTCTTACCAGTAT                           |
| AAAGCCAACGCTCAACAGTAGAGAGGCGTTTTAGCGAACCTCC                          |
| GAAGGCTTATCCGGTATTCTAAAACAATAGATAAGTCCTGAAC                          |
| AAGAAAAATAATATCCCATCCATAGCAAGCAAATCAGATATA                           |
| TAGGAATCATTACCGCGCCATAATTTACGAGCATGTAGAAACCAATCAA                    |
| CCGCACTCATCGAGAACAAGCAAGCCGTTTTTATTTTCATCG                           |
| AAGGTAAGTAATTCTGTCCAGACGAGAACGGGTATTAACCAAGTA                        |
| TAATCGGCTGCTTTCCTTATCATTCCAACGACAATAAACCAATGTTACAGT                  |

|                                                                   |
|-------------------------------------------------------------------|
| AATGCAGAACGCGCCTGTTTATCGCTTAATTGAGAATCGCCATATTTAAACAACGCCA        |
| AGGCGTTAAATAAGAATAAAACAAATAATAAGAGAAATATAAAGTACCGACAA             |
| ACATGTAATTTAGGCAGAGGCATTTTCGAGCCAGAACCGGAATCATAATTAAGTAAAA        |
| AGCCTGTTTAGTATCATATGCGTAACTTTTTCAAATATATTTTAGTTAATTC              |
| CAAAATCATAGGCTGAGAGAAAAAAATACCGACCGTGTGATAAATA                    |
| ATCTTCTGACCTAAATTTAATGGTTTGAAATACCTTTTTAACCTCCGGCTTAGG            |
| TTGGGTTATATAACTATATGTAAAATTAATTTCCCTTAGAATCCTGAAAAAC              |
| ATTGAGGAAGGTTATCTAAAGAGTCAATAGTGAATTTAT                           |
| ATAGCGATAGCTTAGATTAAGACGCTGAGATTTAATGGAAACAGTACAT                 |
| TAACAATTTCAATTTGAATTACCTACATTATCATTTTTCGCGAACAAAGAAACC            |
| ACCAGAAGGAGCGGAATTATCATCATATTAATCAATTACCTGAGCAAAAG                |
| CAGAGGCGAATTATTCATGAAATGCGTAGATTTTCAGGTTTAACTG                    |
| GGATCCCCGGGTACCGAGAACATCGGGAGAAACAATAACG                          |
| CAGATGAATATACAGTAAACAGTACCTTTTAAGAATTTCGTAATCATGGTCA              |
| CACGTAACAGAAATAAAATGATTATCAGATG                                   |
| TAGCTGTTTCTGTGTGAAAACCATATCAAAATTTTGG                             |
| TTCTGAATAATGGAAGGTTAGAACCTGTTATCCGCTCACAATTC                      |
| TAATGAGTGAGCTAACTACATTAATTGCAATATAATCCTGATTGTTGGATTATAC           |
| ATGGCAATTCATCAACGTATTAATCCTTTGCCCGAACG                            |
| TTATTAATTTTAAAAGTTTGAGTAATATCTTTAGGAGCACTA                        |
| AGTATTAGACTTTACAACAATTTCGACAACCTCGCTAGGGCGCTGGCAAGT               |
| AATGCGCCGCTACAGGGCGGTACCGTCAATAGATAATACATTTGAGGATTTAGA            |
| ACAACATAAGATTAGAGAAATCAACAGTTGAAAGGA                              |
| ATCAATATCTGGTCAGTTGGCACTATGGTTGCTTTGACGAGCA                       |
| CGTATAACGTGCTTTCTCGTACCTCAAATATCAAACCTCA                          |
| AAAAATCTAAAGCATCACCTTATTAGTAATAACATCACTTGC                        |
| CTGAGTAGAAGAAGTCAAACCTGCTGAGAGCCAGCAGCAAATG                       |
| GCCTGCAACAGTGCCAAAAGGGACATTCTGGCC                                 |
| AACAGAGATAGAACCAGGTCAAGTATTAACACC                                 |
| GAAGATAAAACAGAGGTGAGGTTCTGACCTGAAAGCGTAAGAATACGTGG                |
| CCCTAAAACATCGCCATTAATAACCGAACGAACCAACAGCA                         |
| TTTGACGCTCAATCGTCTGAACTTTAATGCGCGAACTGATAG                        |
| CACAGACAATTTTTGAATGGCTATTAGTGGATTATTTACATTGGCAGATTC               |
| ACCAGTCAACAGACCAGTAATAAAATCGGCCTTGCTGGTAATATCCAGAACAA             |
| TCAGTGAGGCCACCGAGTAAAACGCTCATGGAAATACCTACAT                       |
| TATTACCGCCAGCCATTGCAACAGGAAAAAGAGTCTGTCCATCACGCAAATTA             |
| ACCGTTGTAGCAATACTTCTTTGTAGAATCAGAGCGGGAGCTAAACAGGAGGCCGAT         |
| GTAGCGGTCACGCTGCGCAATCCTGAGAAGTGTTTTTATAA                         |
| TAAAGGGATTTTAGACAGGAACGGTACGCCAGAAGTAACCACCACCCGCCGCTT            |
| AAGCGAAAGGAGCGGGAGTTGCGCTCACTGCC                                  |
| GCTTTCCAGTCGGGAAAAGAAAGGAAGGAAGA                                  |
| AAAGCCGCGAACGTGGCACCTGTCGTGCCAGCTGCATTAAT                         |
| TTTTTCTTTTACCAGTGAGACGGGCAACAGATTTAGAGCTTGACGGGG                  |
| CGGAACCCTAAAGGGAGCCCCAGCTGATTGCCCTTCA                             |
| ACAAGAGTCCACTATTAGGTGCCGTAAGCACTAAAT                              |
| CCCAAATCAAGTTTTTTGGGGTCAAAGAACGTGGACTCCAACGTCAA                   |
| CCGCTGGCCCTGAGAAGATGGCCCACTACGTGAACCATCA                          |
| GGGCGAAAAACCGTCTATCAGGGAATCCCTTATAAATCAAAGA                       |
| ATAGCCCGAGATAGGGTTGAGGTTGTTCCAGTTTGGGA                            |
| TGGTGGTTCCGAAATCGGGAGTTGCAGCAAGCGGTCC                             |
| CACACAACATACGAGCCGAAAAAAAGGCGAAAAATCCTGTTTGA                      |
| ACGCTGGTTTGGCCAGCAGGCGGTTTTCGTATTGGGCGCCAGGGTGG                   |
| GAATCGGCCAACGCGGGGAGAAAGCATAAAGTGTAAAGCCTGGGGTGCC                 |
| CTTCTGGTGCCGAAACAGGCAAAGAAAACGAAAGGGGGATGTGCTGCAAGGCGATTAAGTTGGGT |
| TCGCTATTACGCCAGCTGCGCCATTCGCCATTCAGGC                             |

**Supplementary table 9.** Staple strand sequences for folding the map of Scandinavia flat sheet.

|                                                      |
|------------------------------------------------------|
| GACCTCTGGTTGTGAAGCAACTCGTCGGTG                       |
| TCCACACAACATACGAGCCGGAAGCATTCTCCGAACTCT              |
| ATTTACATAAATCAAAGGGGGATGTGCTGCAAGGCGA                |
| TGTAAAACGACGGCCATTGAATCGGCTGACGC                     |
| GGCACGAATATAGGGGCCAGTGCCAAGCTTGATACCGA               |
| CAGTGCGGCCCTGCCATCAAAAGTAATGAGTAAACAGG               |
| GGCAAAGCGCCATTCAATTCCAGTCACGACGT                     |
| TTAAGTTGGGTAAACGCCAGGGTTATTAGGCTGCGCAACTGTTGGG       |
| CCAGCTGGCGTAAAGTGTAAGCCTGGGGTGCCTAATGAGTGAG          |
| GAATCGGCCAACGCGCGGGGAGAGGCGGTTTGCCTATTGTCCTATTACG    |
| AAGGGCGATCGGTGCGGCCTCTGACGACGACAGTATCGGCCTCAGGAAGAT  |
| GATTCTCCGTGGGAACAAAACTGGTGCCGAAACCA                  |
| CGCACTCCAGCCAGCTTCCGCGACCGCTAAACGGCGGATTGACCGTAATGGG |
| ATCTGCCAGTTTGAGGAAAGCGCCAGGGTG                       |
| TTAGAGCTTGACGGGGAAAGCCGGCGCATCGTAACCGTGC             |
| ATAGGTCACGTTGGTGTAGATGGTTCCTGTAGCCAGCTTTCA           |
| TTGTTAAAATTCGCATAAAGAGTAACAACCCGTCG                  |
| TCAACATTAATGTGAGCTAAATTTTGTAAATCAG                   |
| TAATTCGCGTCTGGCCAACGTGGCGAGAAAGGAAGGGAAG             |
| GCTGCGCGTAACCACCACCCGGGAACGCCATCAAAAA                |
| CTCATTTTTTAACCAATACGTAAAACCTAGCATGT                  |
| CAATCATATGTACCCCATGTAAACGTTAATATT                    |
| AAGCAAATATTTAAGTTGATAATCAGA                          |
| AGTAATGTGTAGGTAAAAAGGAAGATTGTAT                      |
| AAAGCCCCAAAACATTGCCTGAGAGTCTGGAGCAA                  |
| CAAGAGAATCGATGAACGGTAATCCGCGCTTAATGCGCC              |
| TTTTGAGAGATCTACAAAGGCTATCAGGTGATTCAAAGGGTGAGAAA      |
| GCTACAGGGCGCGTACGATAAATTAATGCCGGAGAGGGTAGCTAT        |
| TTCAACCGTTCTAGCTTTAAAGGGATTTTAGACAG                  |
| CACCGAGTAAAAGAGTCTGTCCATCACGCCACCATCAATATGATA        |
| GGCCGGAGACAGTCAAAACCTTTATTTCAACGCAAGGATAAA           |
| AGGCAAAGAATTAGCAAAATTAATTAATGCAATGCCTG               |
| AATTTTTAGAACCCCTCATATTAAGCAATAAAGCCTCAGAG            |
| TGTAATACTTTTGGCGGAGAAAAATTAACCGTT                    |
| ACACTAAAACACTCATCTTTGGTACCAAAAAACATTATGACCC          |
| CATAAAGCTAAATCGGTTAGGTGGCATCAATTCTACT                |
| TTTAGTTTGACCATTAGATACATCCAATAAATCATAACAGGCA          |
| AATAGTAGTAGCATTAAACATTTGCAAATGG                      |
| TGGGGCGGAGCTGAAACCCCGAGCGATTA                        |
| ATCGCCTGATAAATTGTGCGAAATAGCTATATTTTCATT              |
| TCAATAACCTGTTAGTACCTTAATTGCTCCTTTTGATAA              |
| GAGGTCATTTTTGCGGATGGCTTAGAACCAATTCTGCGAACGAGTAGA     |
| TTCATTCCATATAACAGTTGATTGCTTAATTGCTGAATATAATGCTG      |
| GAATGACCATAAATCAAAAACTAAAGTACGGTGTCTGGAAGT           |
| TAGCTCAACATGTTTTAAATATGGCAAACCTCCAACA                |
| GGTCAGGATTAGAAAAATCCGCGACCTGCTCC                     |
| TTCGAGCTTCAAAGCGAACCCAGACCGGAAAAATCAGGTCTTTACCTGA    |
| ATGTTACTTAGCCGGAACCCGAAAGACTTCAAATATCGCGTTTTAA       |
| AAAGATTAAGAGGAAGAAATAGTAAATGT                        |
| ATTCATTGAATCCCCCTCAATGCTTAAAAGCGGATTGCATCAA          |
| CTATTATAGTCAGAAGCAATAAACAGTTCAGAAAAACGA              |
| ACGAGGCATAGTAAGAGCAACTATAGTCCAATACTGCGGAATCGTCATAAAT |
| TTAGACTGGATAGCATAACCCCTGTTTACCAG                     |
| AGAAGTTTTGCCAGAGGGGGTAGAGGGCGCAGACGG                 |

|                                                            |
|------------------------------------------------------------|
| AGGACAGATGAACGGTGTACAGAATAGCGAGAGGCTTTTGCAA                |
| ACGACGATAAAAAACAAAAGAAACACCAGAACGA                         |
| GTAGTAAATTGGGCTTTGAGATACATAACGCCAAAAGGAATT                 |
| AGGAATACCACATTCAACGAGATGGTTAATTTCAAC                       |
| TAAGAAGTGGCTCAGATTCATCAGTTGAGATTT                          |
| AACAACATTATTACAGGTAATTATACCAGTCAGGACGT                     |
| CAGACAGCCCTCATAGTTATAATAAAACGAACTAACGG                     |
| TGGGAAGAAAAATCTACGACAACAAAGGAATTGCGAATAAT                  |
| AATTTTTTCACGTTGAAAATCTCACCTTATGCGATTT                      |
| TTTAATCATTGTGAATTATCAACGTAACAAAGCTGCTCATT                  |
| AGTGAATAAGGCTTGCCCTGACGCCAGGCGCATAGGCTGGCT                 |
| ATATTCATTACCCAAAAAAAAAAAAAGGCTCCAAAAG                      |
| TTAAACAGCTTGATACCGATAGTTGCGCCATCTTGACAAGAACCGG             |
| GACCTTCATCAAGAGTAATTTGAGGACTAAAGACTTTTTTCATGAG             |
| GAAATTTCCATTAAACGGGTAATAAAACCGAACTGACCAACTTTGAAAG          |
| TCAATCATAAGGGCAAAGTACAACGGAGATTTGTATC                      |
| TACCAAGCGCGAAAGTAATGCCACTAC                                |
| GTAGCAATACAAAACGAAAGAGGCAAAAAGAAAT                         |
| GAAGGCACCAACCAACAGCATCGGAACGAGGGT                          |
| AGCAACGGCTACAGAGGCAAAAACAATGACAACAACCATCG                  |
| CGCTTTTTCGGGATCGTCACCCTCAGCAGCGAAAATTTGATTAGTAATAACATC     |
| GGTAATATCCAGAACAATATTCGGTTCGCTGAGGCTTGACGGGAGTTAAAGGC      |
| CCCACGCATAACCGATATAACATAATCAAAATCACC                       |
| GGAACAGAGCCACCATTATCAGCTTGCTTTTCGAGGTGAATTC                |
| GAGCCTTTAATTGTATCGAGTTTCAGCGGAGT                           |
| GAGAATAGAAAGGAGCGTAACGATCTAAAGTT                           |
| GATTTTGCTAAACAACCTTCAACAGAACCGCTCCCT                       |
| GCCACCACCCTCAGAGCCATTAGTAAATGAATTTTCTGTATGG                |
| TTGTCGCTTTCCAGACGCAACGCCTGTAGCATTCCA                       |
| TCACCAGTACAAAAAGCCCAATAGGA                                 |
| GTGTATCACCGTACTCAGGAGGTTAAAAAAAACACTGAGTTTCG               |
| ACCCATGTACCGTATACCGCCACCCTC                                |
| CCACCCTATTTTCAGGGATAGCGCCACCAGAACCCACCAGAGCC               |
| GATTGGCCTTGATATCAGAACCGCCACCCTCAGAGCCA                     |
| AGAACCGCCACCCTTAATGCCCCCTGCCTATTTTCGGAACC                  |
| TATTATTCTGAAACATGAAAGTATTAAGGTTGATATAAGTATAGCCCGGAATAG     |
| GGCGGATAAGTGCCGTCGAAAGAGGCTGAGACTCCTCAA                    |
| CACCCTGAACAAAGTCAGAAAAGGGGTTTTGCTCAGTACCA                  |
| GAGAAGGATTAGGATTAGGCTTTTGATGATACAGGAGTACTGGTAATAAGTTTTAA   |
| CGGGGTCAGTGCCTTGAGTAACAGTGCCCGTATAAACAGTCACAAACAAATAAATCCT |
| TTCCAGTAAGCGTCATACATGAGGGTAATTGAGCGCTAAT                   |
| CAAGAAAACAATGAAATAGCAATAGCTATCGCGCAGTCTCTGAATTTACCG        |
| CATTAAGCCAGAATGGAAGTAGAAAATACATACATAAAGGTGGCAAC            |
| ATATAAAGAAACGCAAAGACACCAGGAAAGGCAGGTCAGAC                  |
| GCCGCCAGCATTGACAGGAGGTTTATTATTAAAGGTGAATTAT                |
| CACCGTCACCGACTTGAGCCAACAGAACCGCCACCCTCAGA                  |
| CAGAGCCGCCACCAGCGCTTTTCATCGGCATTTTCGGTCAT                  |
| AGCCCCCTTATTAGCGTTTGCCATTTTTACCGCCAGCCATTGC                |
| GTTTGCCTTTAGCGTCAGACTGTTTTGGGAATTAGAGCCAGC                 |
| AACAGGAAAAACGCTCCGTAATCAGTAGCGACAGAATCAA                   |
| ACCAATGAAACCATCGATAGCAGCACACCAGCAGAAGATAAAAACA             |
| TGCCACGCTGAGAGCCAGATTACCATTAGCAAGGCCGGAACGTC               |
| AAAATCACCAGTAGCACCAGAGGGAAGGTAAA                           |
| TATTGACGGAAATATAAGTTTATTTTGTACAA                           |
| GGGCGACATTCAACCGATTGAGGAAGCAAATGAAAAATCT                   |
| CGGCTGCTTTCTTAGGTTTACCAGCGCCAAAGACAAAA                     |

|                                                              |
|--------------------------------------------------------------|
| TCAATAGAAAATTCATATAAAGAACTGGCATGATTAAGACTCC                  |
| TTATTACGCAGTATGTTAGCAAATTACCGAAGCCCTTTTAA                    |
| GAAACGCAATAATAACGGAATACCCAATCCAAGAACGGGTATTA                 |
| CCGTTTTTATTTAGAACAAGTTACCAGAAGGAAACCGAG                      |
| GAAAAGTAAGCAGATAGCAGCCTAATTTGCCAGTTACAA                      |
| AATAAACAGCCATATTATTTAAAGAATTGAGTTAAGCCCAATAAAGAG             |
| ATCAGAGAGATAACCCACGACGGGAGAATTAAGTAA                         |
| AACATAAAAAACAGGGAAGCGCATATCCAATCCAATAAGAAACGATT              |
| AAATCAAGATTAGTTGCTATTAATAGCAGCCTTTACAGAGAGAAT                |
| TTTTGTTAACGTCAAAAATGAATTGCACCCAGCTACAATTTTATCCTGAAT          |
| CTTACCAACGCTAACGAGCGTCTTTCCAGAATCGTAGGAAT                    |
| CATTACCGCGTGCGGGAGGTTTTGAAGCCTT                              |
| CGTTTTAGCGAACCTCCCCAATAGCAAGCAAATCAG                         |
| CGCCAACATGTAAGTATTCTAAGAACCGGAGG                             |
| ATATAGAAGGCTTATCCGAGAGAAACAAGCAAG                            |
| AACCAAGTACCGCACTCAAACAATAGATAAGTCCTGAACAAGAAAA               |
| AAAGCATCACCTTGCTAGAAACCAATCAATAAT                            |
| TAATATCCCATCCTAATTTACGAGCATGTCCGTCATAGATAATA                 |
| CAGAACGCGCCTGTTTATATAGGCAGAGGCAT                             |
| CATTTGAGGATTTAGAAAACAACATGTTTCAGCTAATG                       |
| AAAGTAATTCTGTCCAGACGACGACAATAGATTATCAGATGATGG                |
| GAATCATAATTACTAGAAAAAATAAGAGAATATAAAGTACCGACAAAAGGT          |
| TTTCGAGCCAGTACCATATTTAACAA                                   |
| AACAGTAGGGCTTAATTGGCCTGTTTAGTATCATATG                        |
| TACCTTTTTAACCTCCGGCAGTATAAAGCCAACGCTC                        |
| CGTTATACAAATCTTACGACCTAAATTTAATGGTTTGAAT                     |
| CAATTCATCAATATAAAAGTTAATAAGAATAAACACCG                       |
| ACCGACCGTGTGATAAATAAGGCAGAAACAATAACGGAT                      |
| AATTCATCTTCTTTAGGTTGGGTTATATAAC                              |
| TCGCCTGATTGCTTTGAATATATTTTAGTT                               |
| GAACGCGAGAAAACTTTTCAAATTACCTTTTTAAT                          |
| CAATAGTGAATTTATCAACAAATCCAATCGCAAGACAAA                      |
| TATATGTAATGCTGATGAATCATAGGTCTGAGAGAC                         |
| GGAAACAGTACATAAAAAAGACGCTGAGAAGAGT                           |
| GAAAACATAGCGATAGCTTAGATTCAATATATGTGAGTGAATAACCT              |
| AAACAAACATCAAGAAAACAAAATTAATTTCCCTTAGAATCCTT                 |
| TGCTTCTGTAATCGTCGCTATTATTAATTACATTT                          |
| AACAATTCATTTAAATACCAAGTTACAAAATCGCGCA                        |
| AGATTTTCAGGTTTAAACGTGAGTGAACCTGAGCAAAAAGAAGATGATG            |
| GAGGCGAATTATTCATTTCAATTATACAGTAACAGT                         |
| ACCTTTTACATCGTCCTGATTGTTGGATTATACTTCTGAATAATGG               |
| TAAAAGTTTGAGTAACAAAACGTAACAGAAATAAAGAAATTCGCT                |
| AAGGGTTAGAACCTACCATATCAAAATTAATTTGCAATTATCATTTTGCAGCAAAAGAA  |
| ACCACCAGAAGGAGCGGAATATCATCATATTCCAAGTATTAGACTTTACAAAACAAATTC |
| AAGGTTATCTAAAATATCTTTAACGAACGTTATTAATTT                      |
| GACAACCTCGTATTAATCCTTTGAGGAGCACTAACA                         |
| ACTAATAGATTAGAAACCTCAAATATCAAACCTCAAT                        |
| GCGTAAGAATACGTGGCACAGACAAACAGTTGAAAGGAATTGAGG                |
| CAATATCTGGTCAGTTGGCAAATTTAACACCGCCTGCAACAG                   |
| GAGGTGAGGCGGTGAGTAATATTTTGAATGGCTATTAGTCT                    |
| AAATACCGAACGAACCATGGAAATACCTACATTTTACGCTCAAT                 |
| AATAAAAGGGACATTCTGGCCAAAAACATCGCCATTAA                       |
| TTAATGCGGAACTGATAGCCCTAAGATAGAACCCTTCTGACCTGAAA              |
| GAAACGGTACGCCAGAATCTTACCAGTCAACACGACCAAT                     |
| CGTCTGAAATGGATTATTTACATTGGCAGTCAAACCTATCGGCCTTGCT            |
| ACTTGCTGAGTAGAAGAACTGAGAAGTGTTTTTATAATCAGTGAGGC              |

|                                                             |
|-------------------------------------------------------------|
| AGCTAACAGGAGGCCGATATGGTTGCTTTGACGAGC                        |
| CAGGGCGATGGCCCACTACGTGAACCAATCGTTAGAATCAGAGCGGG             |
| ACGTATAACGTGCTTTCCGGCGCTGGCAAGGTAGCGGTAC                    |
| AAAGCGAAAGGAGCGGGCGCTAGATCACCCAAATCAAGTTTTTTGGG             |
| GTTTTTCTTTATCGGAACCCTAAAGGGAGCCCCGAT                        |
| GTCGAGGTGCCGTAAGCACTAACCCCTATAAAATCAAAA                     |
| GAATAGCCCGAGATAGAACGTCAAAGGGCGAAAAACCGTCTAT                 |
| AAAGAACGTGGACGTTGAGTGTTGTT                                  |
| GTTTGCCCCAGCAGGCAAAGAGTCCACTATT                             |
| CCAGTTTGAACAAAAATCCTGTTTGATGGTG                             |
| GTTCCGAAATCGGCAAAAACCAAGTGAGACGGGCAACAGCTGATTGCCCTTACCAGCC  |
| CGGAGGATCCCCGGGTACAACAAGCGGTCCACGCTG                        |
| TGGCCCTGAGAGAGTTGCAGCTTTCCAGTCGGGAAACCTGTCGTGCCAGCTGCATTAAT |
| CTAACTCACATTAATTGCGTTGCGCTCACTGCCCGAGCTCGAATTCGTAATC        |
| GCTTAAGCTACGTGGTTGTGTGAAATTGTTATCCGCTCACAAT                 |
| ATGGTCATAGCTGTTCCCTGTTACCTCGATAAAGA                         |
